1 **Sucrose-dependence of sugar uptake, quorum sensing and virulence of the**  
2 **rice blight pathogen *Xanthomonas oryzae* pv. *oryzae***

3  
4  
5 Mayuri Sadoine<sup>1¶</sup>, Juying Long<sup>2,3,¶</sup>, Congfeng Song<sup>2,3,¶</sup>, Yugander Arra<sup>1</sup>, Wolf B.  
6 Frommer<sup>1,4,\*</sup> and Bing Yang<sup>3,5,\*</sup>

7  
8 <sup>1</sup> Institute for Molecular Physiology, Heinrich-Heine-University, Düsseldorf,  
9 Germany

10 <sup>2</sup> College of Plant Protection, Key Laboratory of Integrated Management of Crop  
11 Diseases and Pests, Ministry of Education, National Experimental Teaching  
12 Center for Plant Production, Nanjing Agricultural University, Nanjing 210095,  
13 China

14 <sup>3</sup> Department of Genetics, Development and Cell Biology, Iowa State University,  
15 Ames, IA 50011, USA

16 <sup>4</sup> Institute of Transformative Bio-Molecules (WPI-ITbM), Nagoya University,  
17 Nagoya, Japan

18 <sup>5</sup> Division of Plant Science and Technology, Bond Life Sciences Center,  
19 University of Missouri, Columbia, MO 65211, USA

20  
21 \* Corresponding authors: Bing Yang and Wolf B. Frommer

22  
23 **Email:** [yangbi@missouri.edu](mailto:yangbi@missouri.edu); [frommew@hhu.de](mailto:frommew@hhu.de)

24  
25  
26 ¶These authors contributed equally to this work.

27 **Abstract**

28 Virulence of *Xanthomonas oryzae* pv. *oryzae* (*Xoo*), which causes bacterial blight  
29 of rice, depends on induction of host SWEET sucrose efflux transporters. It  
30 remained unknown whether secreted sucrose serves bacterial nutrition or host  
31 defense. Here we identified the *sux* sucrose uptake/utilization locus of *Xoo* and  
32 demonstrate that it is necessary and sufficient for sucrose acquisition. Induction of  
33 *sux* genes during infection closely tracked induction of rice *SWEET11a*. *sux*  
34 mutants were defective in swimming, swarming, extracellular polysaccharide  
35 (EPS) production and biofilm formation. EPS synthesis in mutants was restored by  
36 the quorum-sensing factor DSF. Notably, transcripts for rate limiting steps in DSF  
37 production were unaffected by sucrose, transcripts of the DSF receptor were  
38 sucrose-inducible and increased during infection, indicating sensitization to DSF  
39 in response to sucrose supply. Sucrose induced the sigma factors RpoN1 and  
40 RpoN2 that regulate swimming, EPS and virulence. Furthermore, in contrast to  
41 *Xanthomonas axonopodis* pv. *manihotis*, virulence of *Xoo* depended critically on  
42 *sux* gene function. Together, pathogen-induced sucrose efflux from host cells likely  
43 induces bacterial sigma factors and sensitizes quorum signaling necessary for  
44 biofilm formation and colonization of the xylem, serves as energy source for  
45 swimming against the xylem stream, and as nutrient for growth.

46 **Author summary**

47 If we want to efficiently protect plants against infections, we need to understand  
48 the disease mechanisms. Bacterial blight is a major scourge for rice production in  
49 Asia and Africa. We had found that disease-causing bacteria use a set of keys, so-  
50 called TAL effectors, to switch on sugar transporter genes in rice leaves causing  
51 sucrose release around the bacteria. A key question was whether the sugars act  
52 primarily in activation of host defense, or serve as nutrients and signals for  
53 bacterial infection. Here we provide evidence that both the ability to attack as well  
54 as the growth of bacteria depend on sucrose uptake. We unravel a regulatory  
55 network including transcriptional regulators, quorum sensing, swimming, biofilm  
56 production and virulence that all depend on sucrose uptake. These discoveries  
57 may prove to be crucial for the development of strategies for protecting rice against  
58 this disease.

59

## 60 Introduction

61 Diseases massively decrease global rice production (1). Bacterial blight (BB) is  
62 among the most damaging diseases in rice. Yield loss due to the causative  
63 bacterium *Xanthomonas oryzae* pv. *oryzae* (*Xoo*) is estimated to be up to 50 %,  
64 mostly in tropical and sub-tropical areas (2). *Xoo* is a vascular pathogen that enters  
65 rice leaves through water pores and wounds and subsequently colonizes the  
66 water-conducting xylem vessels (3). Colonization of the xylem, a unique niche,  
67 presents a major challenge to *Xoo*. Vascular wilt pathogens may exploit this niche  
68 to avoid competition with other microbes (4). However, the bacteria must colonize  
69 the xylem against the high flow rates of the xylem sap (5,6), which is generally  
70 faster than the bacterial swimming velocity (7). Moreover, the oxygen tension in  
71 the xylem is low, so incomplete oxidation requires higher amounts of  
72 carbohydrates from the pathogen (8). A further challenge is the comparatively low  
73 sugar concentration in the xylem sap (9–13). If we assume that guttation fluid could  
74 be a proxy for xylem sap composition, sugar levels are likely insufficient, since  
75 freeze-dried guttation fluid does not support growth of *Xoo* (14). This potential  
76 shortage of sugar components may limit *in planta* growth of *Xoo*. Since  
77 glucokinase gene (*glk*) mRNA levels increase under low oxygen tension and since  
78 *glk* mutants show impaired pathogenicity, it has been hypothesized that carbon  
79 and energy could possibly derive from uptake of glucose by the pathogen (15).  
80 However, the microbial phosphoenolpyruvate-dependent phosphotransferase  
81 system (PTS) for glucose uptake, which is essential for glucose uptake by *Xoo in*  
82 *vitro*, was not required for virulence (16).

83 Bacteria that manage to migrate against the xylem stream need to find a suitable  
84 hold where they can attach to living cells in the xylem in order to engage the type-  
85 III secretion system (T3SS) that enables injection of effector molecules into the  
86 living host cells, here the xylem parenchyma (17–22). The details for this remain  
87 unknown for *Xoo*, but *Erwinia amylovora* attaches to the xylem wall with the help  
88 of fimbriae (23). Much like the near-surface swimming of *Salmonella* in animal and  
89 human intestines, it is conceivable that *Xoo* also switches to a swimming mode  
90 before using fimbriae or T3SS components to attach to prominent surface features  
91 protected from the main xylem flow (24,25).

92 Virulence of *Xoo* is triggered by quorum-sensing (QS) factors that are secreted by  
93 the bacteria (26). *Xoo* also uses QS molecules that are distinct from those studied  
94 predominantly in the animal systems, and include the diffusible signal factor AHLs,  
95 DSF (*cis*-11-methyl-2-dodecenoic acid) and BDSF (*cis*-2-dodecenoic acid), which  
96 are intermediate chain fatty acids. In *Xoo*, DSF and BDSF are key signaling  
97 molecules involved in the control of virulence in response to cell density (27–29).  
98 Living in the xylem creates another unique challenge for the bacteria, since sap  
99 flow dilutes the secreted QS factors. Biofilm may protect quorum sensing factors  
100 from wash out. In *Pseudomonas aeruginosa*, either increased production of the  
101 QS factor acyl-homoserine lactone (HSL), or increased sensitivity to HSL, may  
102 contribute to effective quorum sensing in conditions of surrounding fluid flow (30)  
103 (31). Polymers secreted by pathogens, such as EPS play a role in various aspects  
104 of the infection process, namely bacterial adhesion on host cell surfaces, cohesion

105 of colonies and providing a protected domain. During colonization, *Xoo* secretes  
106 exopolysaccharides (EPS; here xanthan gum) and uses swarming to produce  
107 biofilm. EPS production, swarming motility and biofilm formation under control of  
108 quorum sensing (26). While in some cases swarming motility and EPS production  
109 have been shown to play roles in virulence, several *Xoo* mutants with reduced EPS  
110 production did not show altered virulence in rice (32). EPS is a virulence factor in  
111 many bacterial species, (33–36). In *Xoo*, EPS levels and virulence were found to  
112 be correlated when comparing >100 different isolates (37). Moreover, analysis of  
113 a wide range of *Xoo* mutants supports a tight link between EPS content and  
114 virulence as well. Notably, a mutant in the acetyltransferase gene *gumG* was  
115 impaired with respect to EPS production and virulence (38). Taken together, both  
116 colonization and bacterial proliferation in the xylem likely requires substantial  
117 amounts of carbon and energy in early infection process.

118 After establishment of the T3SS, *Xoo* injects a variety of effector proteins, including  
119 members of a family of diverse TAL effectors (TALe, transcriptional activator-like  
120 effectors), as key virulence factors (39). TALes transcriptionally activate various  
121 host genes, in particular genes encoding sucrose transporters in the SWEET  
122 family (17,40–42). In this way, bacteria divert the sucrose flux of the host into the  
123 xylem apoplasm (22,43–45). This indicates that acquisition of sucrose from the  
124 host is important for *Xoo* proliferation *in planta*. When leaf clipping introduces  
125 bacteria into the wounded surface, local bacterial growth is largely independent of  
126 SWEETs, while the spread is fully SWEET-dependent (46). This indicates that  
127 SWEETs are important, particularly for migration and colonization of the xylem by  
128 *Xoo*. Notably, all known pathogenic *Xoo* strains depend on induction of SWEET  
129 genes, a feature that has been exploited to generate broad-spectrum resistance  
130 against bacterial blight by blocking the ability of *Xoo* to induce SWEET sucrose  
131 transporters (47,48). Remaining questions include whether the host-derived  
132 sucrose serves to support colonization of the xylem and rapid reproduction or as  
133 a signal for the host that induces defense responses (49).

134 Glucose-transporting SWEETs are not able to support *Xoo* infection and a glucose  
135 uptake-deficient *Xoo* mutant was able to colonize and proliferate in the xylem,  
136 therefore sucrose released from the host's xylem cells via SWEETs may provide  
137 the prime carbon and energy in places accessible to the bacteria (16,50). We  
138 therefore searched for potential sucrose acquisition components in *Xoo*. Genomes  
139 of Gram-negative, phytopathogenic bacteria, and Xanthomonads in particular,  
140 show an enrichment of transport systems that make use of TonB-dependent  
141 receptors (TBDR) (51). A substantial number of these are part of so-called CUT  
142 (carbohydrate utilization) loci. Among them are 'sucrose utilization loci' that are  
143 composed of genes encoding TBDR outer membrane transporters, inner  
144 membrane transporters, hydrolytic enzymes, and SuxR transcriptional regulators.  
145 Analysis of the virulence of 76 TBDR mutants led to the identification of the gene  
146 XCC3358 from *Xanthomonas campestris* pv. *campestris* (*Xcc*), mutants of which  
147 showed delayed symptom development in *Arabidopsis*. Mutations in the sucrose  
148 hydrolase gene, a component of a related locus from *Xanthomonas axonopodis*  
149 pv. *glycines* (*Xag*), showed moderately delayed symptom development (52). In  
150 contrast, mutation of the *suxC* gene, corresponding to the inner membrane

151 transporter, did not affect the virulence of *Xanthomonas axonopodis* pv. *manihotis*  
152 (*Xam*) (53). Thus, the relevance of sucrose uptake for virulence may differ between  
153 *Xanthomonas* species and remains unknown for *Xoo*. To gain insight into sucrose  
154 utilization and any correlation between sucrose metabolism and pathogenicity, we  
155 characterized four genes in the *sux* locus in *Xoo* and found that it is necessary and  
156 sufficient for sucrose uptake, for efficient growth on sucrose, for swimming,  
157 swarming, EPS production, and biofilm formation, and, importantly, for virulence.  
158 Sucrose triggered transcriptional regulation and supplementation of EPS  
159 deficiency by the quorum-sensing factor DSF indicate that, besides roles in carbon  
160 and energy supply, sucrose or its downstream products also serve as signals to  
161 promotes vital bacterial functions during colonization.

## 162 Results

### 163 Identification of a cluster of sucrose utilization genes in *Xoo*

164 To determine if *Xoo* is capable of acquiring host-derived sucrose and to identify  
165 sucrose uptake systems in the pathogen, we searched for potential sucrose  
166 utilization loci in the genome of *Xoo* strain PXO99<sup>A</sup>. Sucrose utilization loci have  
167 been identified in several phytopathogenic *Xanthomonas* species (51). Homology  
168 searches using *suxA* from *Xcc* (XCC3358, encoding a TBDR functioning as an  
169 outer membrane sucrose transporter) (51), identified an 87 % identical gene,  
170 PXO\_02415, which was thus named *suxA* (Table 1, S1 Fig and S1 Table).  
171 Additional components (PXO\_02412, PXO\_02413 and PXO\_02416) were found  
172 in the same locus with 87 %, 88 % and 81 % identity to *suxR*, *suxC*, and *suxB* of  
173 *Xcc*, respectively (Table 1; S1 Fig and S1 Table). While *suxR* and *suxC* are mono-  
174 cistronic, each with their own predicted promoters, namely pR and pC, *suxA* and  
175 *suxB* are polycistronic and are possibly controlled by the single promoter pAB (S1  
176 Fig). The components and spatial arrangement of the *sux* gene cluster are highly  
177 conserved among *Xanthomonas* spp. (S2 Fig, S2 Table).

178 **Table 1. Components of the *sux* locus of *Xoo***

| Locus id<br>PXO99 <sup>A</sup> | Protein id<br>PXO99 <sup>A</sup> | Gene name   | Protein name | Putative function                                                      |
|--------------------------------|----------------------------------|-------------|--------------|------------------------------------------------------------------------|
| PXO_02412                      | ACD60701.1                       | <i>suxR</i> | SuxR         | Lacl type HDH* domain transcriptional regulator                        |
| PXO_02413                      | ACD60702.1                       | <i>suxC</i> | SuxC         | Inner membrane MFS**<br>-type sugar transporter                        |
| PXO_02415                      | ACD60703.1                       | <i>suxA</i> | SuxA         | TonB***-dependent receptor, $\beta$ -barrel outer membrane transporter |
| PXO_02416                      | ACD60704.1                       | <i>suxB</i> | SuxB         | amylosucrase, sucrose hydrolase                                        |

179 \* Helix-Turn-Helix

180 \*\* Major Facilitator Superfamily

181 \*\*\* Glycoside Hydrolase Family 13 ([www.cazy.org](http://www.cazy.org))

## 182 **Sucrose-specific derepression of *sux* genes**

183 To test whether *sux* genes are upregulated during infection or are subject to  
184 regulation by sucrose, mRNA levels of *suxA*, *suxB* and *suxC* were quantified by  
185 qRT-PCR *in planta* and *in vitro* (Fig 1 and S3 Fig). Concomitant increases in  
186 *SWEET11a* and *sux* transcripts were detected in infected rice leaves 3 days post  
187 infection (dpi), and increased further over time, consistent with progressive  
188 infection of the host by *Xoo* (Fig 1a and S3b Fig). Since *Xoo* triggers TALE-  
189 mediated sucrose release by SWEETs from host cells, it is conceivable that  
190 SWEET-derived sucrose could serve as a signal for *sux* gene  
191 derepression/induction. Indeed, the parallel increase of transcript levels of  
192 *SWEET11a* and *suxB* is consistent with the induction of the *sux* gene cluster by  
193 host-derived sucrose (Fig 1b). Analysis of *suxB* and *suxC* mRNA levels in *Xoo*  
194 cultured in the presence and absence of sucrose showed that *suxB* and *suxC*  
195 mRNA levels increased ~25- and ~18-fold, respectively, in the presence of 1 %  
196 sucrose (29 mM; Fig 1c). The induction was sucrose-specific, since transcript  
197 levels for *suxB* and *suxC* were not substantially elevated in the presence of  
198 glucose (Fig 1c).

199 *SuxR* is a member of the *lac* repressor family and may thus function as a sucrose-  
200 dependent repressor of the *sux* gene promoters pAB and pC. The transcriptional  
201 regulator SuxR displays two conserved functional domains from the LacI family of  
202 bacterial regulatory proteins (Pfam IDs: PF13377.6, PF00532.21, PF00356.21,  
203 PF13407.6). An alignment of the promoter regions of *suxA/B* and *suxC* with the  
204 predicted binding motif of SuxR homologs from *Xam* and *Xag* from RegPrecise  
205 database identified a putative binding site for SuxR in *Xoo* (54). A homology model  
206 of SuxR based on its homolog CelR (PDB ID: 5ysz) indicates the presence of an  
207 N-terminal helix-turn-helix DNA binding domain and a C-terminal ligand binding  
208 domain. The sugar binding domain undergoes conformational rearrangement  
209 upon sugar binding which allosterically alters the affinity of the regulator to the DNA  
210 binding site (S3 Fig).

211 To determine whether SuxR might be involved in repression of *suxC* and *suxB*,  
212 mRNA levels were quantified in the  $\Delta$ *suxR* strain. The mRNA of *suxB* and *suxC*  
213 were ~25 and ~58 times higher, respectively, in the  $\Delta$ *suxR* mutants relative to wild  
214 type PXO99<sup>A</sup>, when grown on full synthetic NB medium without addition of sugar  
215 (Fig 1c). Addition of glucose or sucrose had no effect in the  $\Delta$ *suxR* mutant (S3c  
216 Fig) These results show that SuxR of *Xoo* strain PXO99<sup>A</sup> is a negative regulator of  
217 the *sux* gene cluster in response to the disaccharide sucrose but not for the  
218 monosaccharide glucose. These data indicate that sucrose serves as a signal. It  
219 might be interesting to analyze whether SuxR function is restricted to the two *sux*  
220 promoters or whether it is involved in regulation of other targets that play roles in  
221 virulence.

## 222 ***Sux* gene function is necessary for sucrose uptake**

223 To determine if the sucrose utilization locus of *Xoo* is involved in bacterial  
224 multiplication, we examined the role of the *sux* gene cluster by monitoring bacterial  
225 growth on different media (Fig 2 and S4 Fig). On rich media (NBN) containing 1 %

226 sucrose, growth of PXO99<sup>A</sup> was sucrose-dependent (Fig 2c and S4a, b Fig).  
227 Growth of  $\Delta$ sux on NBN with 1 % sucrose was impaired, but grew similar to  
228 PXO99<sup>A</sup> on NBN with 1 % of glucose.  $\Delta$ sux colony diameters were substantially  
229 smaller compared to PXO99<sup>A</sup> on solid NBN containing 1 % sucrose (S4a, b Fig).  
230 *Xoo* does not grow on minimal mineral media but requires a variety of supplements  
231 such as amino acids and sugars (55). On minimal medium supplemented with  
232 glutamate, methionine and sucrose (NSM), growth of the  $\Delta$ sux mutant was  
233 severely compromised and never reached the same Optical Density (OD<sub>600</sub>) as the  
234 control, PXO99<sup>A</sup> (Fig 2d), while replacement of sucrose by glucose fully restored  
235 growth of mutant to the wild type level, demonstrating that the *sux* gene cluster  
236 provides the dominant sucrose uptake system in *Xoo*. Thus, both on basal and rich  
237 media, the *sux* genes are necessary for growth in the presence of sucrose.  
238 Glucose also supported growth of PXO99<sup>A</sup>, and, as expected for a gene cluster  
239 involved in sucrose uptake, growth on glucose containing media (55 mM) was only  
240 slightly reduced on solid media relative to growth on sucrose (S4a, b Fig).  
241 Amylosucrase was essential, since  $\Delta$ suxB showed a growth defect as severe as  
242 that of the  $\Delta$ sux mutant, in which all *sux* genes were deleted. Complementation  
243 with the *suxB* gene restored growth on sucrose to wild-type levels (S4b Fig).  
244 Similarly, the inner membrane MFS transporter SuxC was essential, while  
245 mutation of the TBDR SuxA or the LacI-type repressor SuxR had a weaker or no  
246 effect (S4a, b Fig). The lower efficacy may be due to the redundancy of TBDRs  
247 (51), and the role of SuxR as a negative regulator. SuxC deficiency could be  
248 rescued by complementation (S4a, b Fig). While these data demonstrate the  
249 importance of the *sux* gene cluster and its major role in sucrose uptake and  
250 utilization, the media used for the growth assays contained other nutrients that can  
251 also serve as carbon sources. It was therefore not possible to exclude that other  
252 sucrose uptake mechanisms provide some residual activity. To directly determine  
253 if the inner membrane MFS transporter SuxC is responsible for sucrose uptake,  
254 PXO99<sup>A</sup> and the  $\Delta$ suxC mutant were transformed with the genetically encoded  
255 FRET sensor FLIPsuc-90 $\mu$  $\Delta$ 1V (ref. (56)), and cytosolic sucrose accumulation was  
256 analyzed by monitoring the eYFP/eCFP emission ratio (Fig 2e). The saturating  
257 negative ratio change in response to sucrose addition was consistent with sucrose  
258 uptake in PXO99<sup>A</sup> and binding of sucrose leading to a decrease in the eYFP/eCFP  
259 emission ratio (Fig 2e). The sensor did not report sucrose accumulation in the  
260 mutant (Fig 2e). Taken together, the data provide strong evidence that the *sux*  
261 gene cluster is necessary for uptake and utilization of sucrose as both a carbon  
262 and an energy source required for efficient reproduction.

### 263 ***Sux* gene function is necessary for swimming and swarming motility**

264 Colonization of the xylem after entry via hydathodes requires motility. Two  
265 mutants,  $\Delta$ sux and a representative  $\Delta$ suxB mutants, were tested for swimming  
266 motility on semi-solid media with 0.3 % agar. Both mutants showed a significant  
267 reduction in apparent swimming motility, indicating that sucrose may not only be  
268 required for efficient reproduction, but also motility (Fig 3a and S5a). Efficient  
269 colonization of the xylem requires progressive infection against the xylem stream,  
270 an activity requiring high amounts of energy, especially in a low-oxygen  
271 environment such as the xylem. Swarming is required for the generation of biofilm,

272 which is likely important for colonization of xylem vessel walls during infection.  
273 Similar to swimming, swarming also requires energy. Assays performed on semi-  
274 solid media with 0.6 % agar showed that the apparent swarming motility of  $\Delta$ sux  
275 and  $\Delta$ suxB mutants was impaired (Fig 3b). Of note, cell growth of the mutants was  
276 impaired, thus some of the reduction in apparent motility may be due to lower cell  
277 numbers. Twitching assays with  $\Delta$ sux mutants showed that twitching motility was  
278 impaired as well (S5c Fig). In many bacterial species EPS increases ‘wetness’,  
279 thereby providing conditions for the flagella to function in swarming (57). In addition  
280 to requiring energy, swarming motility could also be limited due to a reduction in  
281 EPS production in the *sux* mutants. Derepression of the gene cluster in  $\Delta$ suxR did  
282 not show detectable differences in swimming or swarming motility (S6 Fig).

### 283 **Sucrose is necessary for EPS production and biofilm formation**

284 EPS and biofilm production require both carbon and energy sources. Deficiency in  
285 EPS production causes changes in colony phenotype. For instance, PXO99<sup>A</sup>  
286 colonies are smooth, mucoid, and shiny, while EPS mutants lose these features  
287 and become drier and flatter. On sucrose-containing media, colonies of  $\Delta$ sux,  
288  $\Delta$ suxC, and  $\Delta$ suxB mutants had EPS-deficiency phenotypes, while EPS  
289 production of  $\Delta$ suxA and  $\Delta$ suxR mutants did not seem to be affected, probably due  
290 to the existence of redundant TBDR functions (51) (S4 and S7a, c Fig). Consistent  
291 with a role of *suxR* as a repressor of the pAB and pC promoters,  $\Delta$ suxR mutants  
292 produced wild-type-like colonies and did not display EPS-deficiency phenotypes  
293 (S4 Fig and S7b Fig). The  $\Delta$ suxC mutant had a less severe colony phenotype,  
294 possibly indicating that sucrose may be processed partially outside the cytosol  
295 (e.g., in the periplasmic space of the bacteria or the interface between host and  
296 bacteria; S4 Fig). The EPS-deficiency was rescued by complementation of the  
297 mutated *sux* genes (S4 Fig). PXO99<sup>A</sup> produced about 30 mg of dry EPS per 10 mL  
298 culture when grown in liquid medium containing 1 % sucrose, while  $\Delta$ suxB and  
299  $\Delta$ sux mutants produced ~20- and ~30-fold less EPS, respectively (Fig 4a, b and  
300 S8 Fig). When sugar was omitted, both wild-type and mutant colonies were small  
301 and EPS levels were lower than levels in presence of sucrose (Fig 4a, b and S4  
302 and S8 Fig). Complementation of the mutants restored EPS production (S4 Fig  
303 and S9 Fig). Addition of glucose rescued EPS production in the mutants almost to  
304 wild-type levels (Fig 4a, S4 and S8 Fig). Since swarming is a prerequisite for proper  
305 biofilm formation and EPS is a key component of biofilm, biofilm formation was  
306 assessed. In the  $\Delta$ sux and  $\Delta$ suxB mutants, biofilm formation was reduced by about  
307 75 % (Fig 4c and S10 Fig). Notably, EPS levels were reduced 10-fold, and biofilm  
308 production had showed a drastic sucrose-dependent reduction of about 75 %.  
309 Taken together, the data show that sucrose uptake is necessary for EPS  
310 production and biofilm formation.

### 311 **Effects of sucrose supply on quorum sensing**

312 In several *Xanthomonas* species, swimming, swarming, EPS production and  
313 biofilm formation are triggered by quorum-sensing factors (58). In *Xoo*, quorum  
314 sensing has been shown to affect bacterial swarming motility (59). We  
315 hypothesized that *sux* mutants might be impaired in quorum sensing, which would  
316 affect their ability to produce EPS. To test the hypothesis, EPS production was



317 measured in the presence or absence of externally supplied *Xoo* quorum-sensing  
318 factor DSF (Fig 4b). Notably, EPS production was sugar dependent, and DSF was  
319 able to partially restore EPS production in  $\Delta$ *sux* and  $\Delta$ *suxB* mutants (Fig 4b). DSF  
320 had no effect in the absence of sugars (Fig 4b). Glucose was able to restore EPS  
321 production, but not to the same levels as sucrose (Fig 4b). Similarly, external  
322 supply of DSF partially restored biofilm formation; consistent with the role of  
323 swarming for biofilm production (Fig 4d). The dependency of many of the observed  
324 *sux* phenotypes on quorum sensing and the observation that DSF can supplement  
325 EPS production in *sux* mutants and may indicate that sucrose plays a role in  
326 triggering quorum sensing. To test the effect of the infection on the key quorum  
327 sensing genes, The accumulation of *SWEET11a* mRNA and transcripts of the rate  
328 limiting enzyme RpfF, the DSF receptor histidine kinase (HK), RpfC, and the dual  
329 function response regulator and cyclic di-GMP phosphodiesterase, RpfG, were  
330 quantified in infected leaves (Fig 5a). Within 5 days post infection, *SWEET11a* and  
331 the *suxB* transcripts accumulated to high levels, and while *rpfF* transcripts were  
332 only marginally increased, *rpfC* and *rpfG* levels were also ~200-fold higher in the  
333 bacteria, indicating that *Xoo* increases the amount of receptor and signaling  
334 components to sensitize the responsiveness of *Xoo* cells to DSF. Host-derived  
335 sucrose appears to cause the sensitization, since sucrose is able to also trigger  
336 elevation of *rpfC* and *rpfG* transcripts *in vitro* after 2, 4 and 6 hours of cultivation,  
337 a time window in which the *sux* genes are induced (Fig 5b, e and S11 Fig). Glucose  
338 had a similar effect, but was 4-5-fold less efficient at the same molar concentration.  
339 Sigma ( $\sigma$ ) factors serve as bacterial master regulators, and the  $\sigma^{54}$  factor RpoN2  
340 from *Xanthomonas* ssp. is essential for motility, EPS production and virulence (60).  
341 The suite of phenotypes observed for *sux* mutants here is consistent with a  
342 contribution of sucrose-dependent regulation of  $\sigma^{54}$  transcript levels, which in turn  
343 plays important roles in colonization and virulence, although likely other factors in  
344 the complex c-di-GMP network also play important roles. This hypothesis would  
345 predict that *RpoN1* and *RpoN2* from *Xoo* are inducible by sucrose. Consistent with  
346 this model, *RpoN1* and *RpoN2* transcripts increased 5- to 6-fold when sucrose was  
347 added, while glucose had a much weaker effect (Fig 5c, e). *Gum* genes are  
348 responsible for EPS production and are under control of RpoN1 and RpoN2 (60).  
349 Consistent with the model, *gum* genes were found to be inducible by sucrose and  
350 to a lesser extent by glucose (Fig 5d, e). Notably, *SuxR* derepression in a  $\Delta$ *suxR*  
351 mutant led to a 3- to 6-fold increase in *RpoN1* and *RpoN2* and *gum* transcript levels  
352 compared to the wild-type (Fig 5c,d, e and S12 Fig), intimating that SuxR might  
353 partially be responsible of the sucrose-dependent regulation of *RpoN1*, *RpoN2* and  
354 *gum* genes. Derepression of *SuxR* did not lead to a measurable increase of *rpfF*  
355 and *rpfC* transcript levels and to only 2-fold increase in *rpfG* transcripts (Fig. 5b, e  
356 and S12 Fig).

357 Together these findings indicate that sucrose, or downstream products, serve as  
358 signals or allosteric regulators that act, at least in part, via  $\sigma^{54}$  to trigger a wide  
359 range of processes required for xylem colonization and virulence, in particular

360 sensitization to quorum sensing factors, flagellar assembly, and EPS production  
361 (60) (Fig 7).

### 362 ***sux* genes are required for full pathogenicity**

363 For some bacteria, swimming, swarming, EPS production and biofilm formation  
364 are necessary for virulence (58,61). For instance, *suxB* mutation has moderate  
365 effects on virulence of *Xag* in soybean, and *sux* mutations delay symptom  
366 development in *Arabidopsis* infected with *Xcc* (52). On the other hand, the *sux*  
367 genes are not required for virulence of *Xam* in cassava (53). The diverse  
368 phenotypes in key functions in the *Xoo* mutants described above make it likely that  
369 *Xoo* virulence is severely impaired in the *sux* mutants. Clipping assays using *Xoo*  
370 mutants were performed on *Oryza sativa* ssp. *japonica* cv. Kitaake.  $\Delta$ *sux* mutants  
371 showed substantial decreases in virulence (Fig 6a, b). Therefore, for rice blight,  
372 the *sux* gene cluster functions as a key virulence factor. The remaining virulence  
373 could be due to a parallel pathway that enables sucrose hydrolysis, e.g., invertases  
374 secreted by the host and subsequent acquisition via hexose transporters.

375 To determine the contribution of each *sux* genes to virulence, the individual *sux*  
376 mutants were tested as well. Likely due to the redundancy described above for  
377 TBDRs,  $\Delta$ *suxA* impaired virulence only slightly. The  $\Delta$ *suxR* mutant did not show a  
378 substantial reduction in virulence, which was also expected since *SuxR* functions  
379 as a negative regulatory factor (Fig 6a, b). In contrast, the  $\Delta$ *suxC* and  $\Delta$ *suxB*  
380 mutants showed a similar reduction in virulence as  $\Delta$ *sux* (Fig 6a, b).  
381 Complementation with respective genes under control of the *E. coli* lac promoter  
382 almost completely restored virulence of the mutants (S13 Fig). Complementation  
383 of the mutants using constructs expressing the genes under their own promoters  
384 yielded similar levels of virulence restoration (S13 Fig). In summary, the *sux* gene  
385 cluster encodes an important function necessary for full virulence, and connects  
386 *Xoo*-induced expression of the host SWEET transporters to carbon and energy  
387 supplies as well as signaling processes required for motility and adhesion (Fig 7).

388

## 389 **Discussion**

390 Pathogens infect plants in order to gain access to host nutrients needed for  
391 effective reproduction. The ability of *Xoo* to directly induce *SWEET* sucrose  
392 transporter genes in the host xylem parenchyma led to the hypothesis that  
393 *SWEET*s release sucrose that serves as carbon and energy for *Xoo*. The key  
394 questions pursued here are whether *Xoo* can acquire sucrose, what the  
395 mechanisms for uptake and utilization are, how the processes are regulated in *Xoo*  
396 and whether the sucrose utilization systems are necessary for virulence. Here we  
397 identified the *sux* locus as a candidate for sucrose utilization in PXO99<sup>A</sup> and  
398 showed that it is necessary for sucrose uptake and for growth of *Xoo* on sucrose.  
399 Since swimming motility is also severely impaired in the mutants, sucrose likely is  
400 required for migration in the xylem as well. The motility provided by the flagella is  
401 insufficient for swimming against the xylem stream, but may be useful either for  
402 swimming in the vicinity of the surface where different streaming conditions  
403 (Marangoni effect) prevail or during periods of xylem cavitation that frequently

404 occur (62). Loss of sucrose uptake activity had additional negative effects, such as  
405 drastically reduced EPS production. Since EPS is polysaccharide, host-derived  
406 sucrose likely serves as a source of carbon, and possibly energy, for its  
407 biosynthesis. Surprisingly, EPS production could be complemented by the  
408 quorum-sensing factor DSF, indicating that sucrose might also serves as a signal,  
409 here to induce DSF production, although this was not demonstrated directly. Since  
410 EPS is a major component of biofilm, and since swarming motility, necessary for  
411 biofilm formation, was also impaired in the mutants, it was not surprising that  
412 biofilm formation was also reduced in *sux* mutants. These multiple effects led to  
413 substantial impairment of virulence in the mutants impaired in sucrose uptake and  
414 utilization. Not all genes in the cluster contributed equally. SuxB (amylsucrase)  
415 and SuxC (inner membrane MFS superfamily transporter) were dominant players,  
416 while defects in SuxA, (outer membrane TBDR) had less severe effects, probably  
417 due to redundancy (51).

418 As one may expect, derepression of the *sux* genes in  $\Delta$ *suxR* mutants neither  
419 affected EPS production nor swarming or swimming motility or biofilm production.  
420 Consistent with these observations,  $\Delta$ *suxR* mutants did not show discernible  
421 effects on virulence, likely because it is not required for sucrose uptake *in planta*.  
422 It is however conceivable that the  $\Delta$ *suxR* mutant may be less competitive due to  
423 the cost of constitutive activity of the cluster.

424 With the new data, we hypothesize the following path of infection: after entry into  
425 hydathodes and subsequent propagation in the epitheme, the bacterial cells swim  
426 upstream against the flow within the xylem and find suitable niches for attachment  
427 and injection of TALes like PthXo1. The TALes trigger release of sucrose, which  
428 is used both as a carbon source and an energy source as well as a signal triggering  
429 biofilm production. At present, the exact order of events remains unclear, since the  
430 xylem stream will likely dilute the quorum signal very rapidly if the pathogens are  
431 not sequestered or protected, such as by the biofilm. *Xoo* cells may produce some  
432 biofilm just after attachment, after which DSF production then enhances EPS and  
433 biofilm production. Subsequently, cells from this colony may leave to found new  
434 colonies further upstream in the xylem. Over 15 days, *Xoo* can progress 15-25 cm  
435 deep into the leaf, while the mutants lacking SWEET-inducing TALE progress only  
436 about 2-5 cm (PMID: 15553245). This progressive colonization model predicts that  
437 disease progression will be saltatory, *i.e.*, that disease progression is initially not  
438 contiguous along the xylem walls, but through formation of distinct colonies. This  
439 hypothesis is testable using *Xoo* carrying a fluorescent protein or by visualizing  
440 local SWEET accumulation at the sites of successful infection. Other aspects of  
441 the model can be tested using host plants or *Xoo* cells that express genetically  
442 encoded sucrose sensors, or even sensors or reporters for quorum sensing. It may  
443 also be interesting to modulate individual components described here to determine  
444 the relative quantitative contribution of the individual factors. While editing of the  
445 three *SWEET* gene promoters currently holds promise for a robust, broad-  
446 spectrum resistance mechanism, a careful analysis of disease mechanics may  
447 provide important insights that will help to defeat new isolates that can overcome  
448 the broad spectrum SWEET-based resistance.

449 Residual low-level virulence of *sux* mutants

450 Clip infection uses high bacterial titers for inoculation and thus is not comparable  
451 to natural infections which likely require only a few bacteria to cause disease. The  
452 residual virulence observed here may therefore not be relevant in a natural  
453 environment. Notwithstanding, the *sux* mutant of PXO99<sup>A</sup> still shows moderate  
454 virulence in clip infection assays, while PXO99<sup>A</sup> strains lacking the TALE PthXo1,  
455 which induces *SWEET11a*, is avirulent. The *sux* mutant is likely still able to use  
456 some sucrose as a nutrient source or as a signal. It will thus be necessary to  
457 identify alternative uptake pathways, possibly via extracellular invertases derived  
458 from the host or enzymes derived from the bacteria that sustain this residual  
459 virulence.

460 Sucrose uptake and utilization by *Xoo*

461 When grown on minimal medium, growth of the  $\Delta$ *sux* mutant is substantially  
462 impaired. Whether the remaining growth makes use of alternative low-capacity  
463 sucrose uptake or is due to the ability of *Xoo* to use glutamate and methionine in  
464 the medium as a carbon source remains to be determined. Yet even on full medium  
465 supplemented with sucrose, effective growth requires the *sux* gene cluster. Uptake  
466 into the cytosol of *Xoo* was measured using a genetically encoded biosensor. The  
467  $\Delta$ *suxC* mutant showed no detectable sucrose accumulation. With a  $K_d$  of 90  $\mu$ M,  
468 the sensor has a linear response range *in vitro* between about 9 and 900  $\mu$ M. Thus,  
469 if we assume that in PXO99<sup>A</sup> the sensor is fully saturated, cytosolic levels exceed  
470 900  $\mu$ M in PXO99<sup>A</sup> exposed to 10 mM sucrose. In the  $\Delta$ *suxC* mutant sucrose levels  
471 remained below 9  $\mu$ M. The recent development of ultrasensitive Matryoshka-type  
472 sensors may be useful to increase the sensitivity of the biosensors further and may  
473 enable analysis of sucrose levels in different compartments of the host and  
474 bacterial cells *in situ* with high temporal resolution.

475 Sucrose and hexoses as nutrients for *Xoo*

476 Previous reports had demonstrated that *Xoo*-triggered induction of at least one of  
477 the sucrose-specific transporters of plant is key to *Xoo* strain virulence in plant,  
478 while glucose-specific transporters do not show significant relationship with *Xoo*  
479 virulence (51). Thus, even if glucose can support growth and other virulence-  
480 related functions, sucrose must be the key player provided by the host.  
481 Nevertheless, *Xoo* is capable of using hexoses, which therefore could be derived  
482 from sucrose by extracellular enzymes such as apoplasmic invertases produced  
483 either by host or the bacteria. Notably, *Xoo* can grow on glucose as well.  
484 *Xanthomonas* genomes encode a large number of candidate hexose transporters  
485 (63). Mutants in the PTS glucose uptake system from *Xoo* for, which was essential  
486 for glucose uptake by *Xoo*, showed no effects on virulence (16). Hijacking of  
487 SWEETs is not unique to bacterial blight in rice but also occurs in bacterial blight  
488 of cotton and cassava (53,64). TAL<sub>Xam668</sub> from *Xam* specifically induced the  
489 sucrose transporter gene *MeSWEET10a*, and virulence depends on the SWEET  
490 induction. Designer TAL effectors complemented the mutant phenotype of  
491 TAL20<sub>Xam668</sub>, demonstrating that *MeSWEET10* is a susceptibility gene in cassava  
492 (53). Despite the similarity of the systems and the relatedness of the *Xanthomonas*

493 species, mutation of the *suxC* gene in *Xam* did not affect virulence. Indeed, *Xam*  
494 infection led to increased mRNA levels of an apoplasmic invertase gene, which  
495 could trigger extracellular hydrolysis of sucrose, followed by hexose uptake by  
496 *Xam*, thereby feeding *Xam* indirectly with sucrose.

#### 497 Sucrose or its products as signals for transcriptional regulation

498 Besides key roles in *Xoo* nutrition, sucrose also serves directly as a signal. SuxR  
499 serves as a sucrose-specific receptor that derepresses the bidirectional pAB and  
500 pC promoters to enable *Xoo* to use sucrose likely after invasion of the host. When  
501 the *suxR* gene was deleted, sucrose uptake and hydrolysis were activated.  
502 Whether SuxR can activate other target genes remains to be tested. Consistent  
503 with the role in activation of sucrose utilization genes,  $\Delta$ *suxR* mutants had no  
504 substantial effect on growth or colony morphology, no effect on EPS levels, and  
505 also did not impair virulence. Sucrose may also serve, directly or indirectly via  
506 downstream metabolites as a signal that triggers quorum sensing (S9 Fig).  
507 Consistent with this hypothesis, DSF was able to supplement the EPS production  
508 in the *sux* mutants. This hypothesis is testable, either by measuring the level of  
509 DSF and BDSF levels in the presence or absence of sucrose, or by developing  
510 biosensors that enable monitoring quorum-sensing factors during the infection with  
511 spatial resolution.

#### 512 A possible role for sucrose in sensitizing *Xoo* to the quorum sensing factor DSF

513 The sensitivity of the bacteria to quorum sensing factors can be modulated by  
514 changing the receptor levels, e.g., for the *N*-acylated L-homoserine lactone  
515 (AHL) sensing system TraR in *Agrobacterium tumefaciens*, LuxR in *Vibrio harveyi*,  
516 LasR and QscR in *Pseudomonas aeruginosa* and RhlR in *E. coli* (65–68). Here we  
517 found that, while transcripts for the rate limiting biosynthetic gene *rpfF* did not  
518 increase when sucrose was added to *Xoo* cells, mRNA levels for the DSF receptor  
519 histidine kinase *rpfC* and the di-cGMP cyclase *rpfG* increased. Glucose also  
520 positively regulated *rpfC* and *G*, however to a much lower extent compared to  
521 equimolar concentrations of sucrose. Importantly, *rpfC* and *G* transcript  
522 abundance was also massively increased during infection, in parallel to that of *sux*  
523 and *SWEET11a* genes. The sucrose-dependent increase may indicate that  
524 bacteria are sensitized to quorum sensing factors when sucrose becomes  
525 available due to PthXo1-triggered release of sucrose from host cells in the xylem.  
526 Notably, at present, the interpretation of our data relies solely on transcriptional  
527 effects, further experiments are required to measure sensitization more directly.  
528 Also, the effect of mutations in the RpoN genes indicates that the regulatory  
529 networks are more complex than described here (60); moreover  
530 posttranscriptional regulations will also affect the response of the system (69).  
531 Therefore, *Xoo* strains that lack the ability to induce host SWEET efflux activity  
532 likely cannot trigger effective quorum sensing, and thus are less effective  
533 swimmers and biofilm producers. Notably, transcripts of the key sigma factor  $\sigma^{54}$ ,  
534 RpoN1 and RpoN2, and its downstream *gum* gene targets, which are responsible  
535 for EPS production, were also sucrose inducible as shown here. Since RpoN1 and  
536 RpoN2 do not appear to be involved in *rpfC* and *rpfG* regulation, the two pathways  
537 may operate independently (60). Data obtained under SuxR derepression may

538 indicate a link between SuxR regulation and *RpoN* and *gum* genes, while  
539 regulation by sucrose of *rpf* genes seems be mediated by an independent  
540 mechanism. Taken together we propose a model in which pioneering *Xoo*  
541 manages enter the xylem, attach to the xylem parenchyma cells and inject TAL  
542 effectors into the host cells via a T3SS. A TALE like PthXo1 then binds to a *SWEET*  
543 promoter and activates transcription and production of a host plasma membrane  
544 sucrose uniporter like SWEET11a. Sucrose is released from the host cells along  
545 a concentration gradient and is then taken up by the Sux transporters into the  
546 cytosol of *Xoo*, where feedforward regulatory circuitry mediated by SuxR further  
547 enhances uptake (Fig 7). Sucrose or its degradation products, or the energy status  
548 trigger sensitization for quorum sensing factors important for further colonization  
549 of the xylem, as well as enhanced swimming and swarming capacity and EPS  
550 production via induction of  $\sigma^{54}$  factors. In particular it is possible that, as a result of  
551 the sucrose availability to *Xoo* cells, the quorum sensing machinery is sensitized  
552 by increased receptor density and cyclase activity to launch a successful attach.  
553 By contrast, when sucrose levels are low, flux through QS signaling is too low,  
554 thereby preventing efficient colonization by strains that cannot induce host  
555 SWEETs.

#### 556 Regulatory networks

557 The regulatory network that controls virulence is highly complex and involves at  
558 least five parallel two component systems (TCS), of which the Rfp system is  
559 responsible for perception of DSF input that affect PDE activity and thus c-di-GMP  
560 levels (70). In turn, c-di-GMP levels differentially affect individual processes that  
561 relate to virulence via 4 parallel pathways (70). Notably, both transcriptional and  
562 translational regulation contribute to control (70). While our data may indicate that  
563 sucrose or a downstream signal could affect the DSF input into c-di-GMP signaling  
564 and affect multiple virulence aspects, it will be interesting to explore the role of  
565 sucrose on the other input and the out pathways. Notably, RfpE appears to not  
566 only play a role in swarming motility EPS production and virulence, but also be part  
567 of a feedback loop that impacts sucrose utilization (71).

#### 568 New questions arising

569 It will be interesting to unravel the nature of the signal that triggers transcriptional  
570 activation of the core virulence genes. The regulatory networks involved appears  
571 to be extremely complex and will require extensive testing of the candidate targets  
572 identified in the *rpoN1* and *rpoN2* mutants and the evaluation of posttranscriptional  
573 regulation (60,72). Ultimately, mathematical modeling will help to understand this  
574 complex network and help to explain why *Xoo* is so dependent on SWEET  
575 induction. While the order of events after attachment with respect to biofilm  
576 production appears obvious, it remains an open question how secreted DSF can  
577 be protected from dilution in the rapidly streaming xylem. This aspect is especially  
578 relevant regarding the possible role of DSF in swimming motility. Also, how *Xoo*  
579 can migrate against the xylem stream and dock at the lateral walls are important  
580 questions. We may be able to learn from studies in other systems, e.g.,  
581 *Salmonella*, which colonizes the intestinal lumen. *Salmonella* uses flagellar motility  
582 to get to the target cell surface, where physical forces lead to trapping for short

583 periods of time in a process termed ‘near surface swimming’ (73). In this mode the  
584 bacteria scan the cell surface and docking at areas with particular  
585 properties. These finding may help guiding research on *Xoo* swimming and  
586 docking.

587

## 588 **Materials and Methods**

### 589 ***Bacterial strains, plasmids, and DNA constructs***

590 Strains of *Escherichia coli*, *Xoo* and plasmids used here are listed in S3 Table.  
591 Standard bacterial culture and DNA techniques were used for *E. coli* and  
592 recombinant DNA manipulations as previously described (74). Liquid and solid  
593 cultures of *Xoo* were grown at 28 °C in NBN (Difco nutrient broth: beef extract, 3.0  
594 g; peptone, 5.0 g/L) and NAN (NB with agar 15 g/L) media, respectively. For  
595 analysis of sucrose dependence, a modified synthetic minimal medium (based on  
596 New Synthetic Medium (73), NSM: (g/L): sucrose (10); Na-glutamate (5);  
597 methionine (0.1); KH<sub>2</sub>PO<sub>4</sub> (1); NH<sub>4</sub>Cl (1); MgCl<sub>2</sub>·6 H<sub>2</sub>O (1); and Fe-EDTA (1 ppm);  
598 MOPS (0.1 M); CaCl<sub>2</sub> (0.1 mM); pH 7.0) was used. Media were supplemented with  
599 sucrose, glucose or fructose at the mentioned concentrations. Antibiotics were  
600 added as follows: ampicillin (100 µg/mL), cephalexin (10 µg/mL), kanamycin (25  
601 µg/mL for *Xoo*; 50 µg/mL for *E. coli*) and spectinomycin (100 µg/mL). *E. coli* and  
602 *Xoo* were transformed by electroporation.

### 603 ***Construction of *sux* mutants in PXO99<sup>A</sup>***

604 The in-frame deletion mutants of *sux* genes ( $\Delta$ *sux*,  $\Delta$ *suxA*,  $\Delta$ *suxC*,  $\Delta$ *suxB* and  
605  $\Delta$ *suxR*) in PXO99<sup>A</sup> were constructed by homologous recombination and marker  
606 exchange as previously described (75) using primers listed in S1 Table. In brief,  
607 5'- and 3'-flanking sequences of each *sux* gene were amplified by PCR from  
608 PXO99<sup>A</sup> genomic DNA. The two PCR-amplicons were fused by overlap extension  
609 PCR and cloned into pGEM-T (Promega) by TA cloning. Constructs were verified  
610 by sequencing. This intermediate construct was then fused to a cassette  
611 containing the *sacB* gene and neomycin phosphotransferase gene in pKMS1*sacB*-  
612 Kn (76) to produce the suicide vectors used to knockout the genes of interest.  
613 PXO99<sup>A</sup> was transformed with pKMS1 constructs by electroporation.  
614 Transformants were plated on selective NA medium containing kanamycin. Single  
615 colonies were transferred to liquid NB medium supplemented with 10 % sucrose  
616 and grown for 12 h at 28 °C, before plating on NA medium supplemented with 10  
617 % sucrose. Single sucrose-tolerant colonies were used to inoculate both solid NA  
618 and NA-containing kanamycin. Sucrose-tolerant and kanamycin-sensitive (tested  
619 as replicates) colonies were putative deletion mutants. The deletions were  
620 confirmed by PCR amplification using primers located outside the homologous  
621 regions used for marker exchange mutagenesis. Deletions were confirmed by  
622 comparing PCR product length. Two independent sets of deleted strains were  
623 generated in two different locations. Both sets gave comparable results for at least  
624 some phenotypes, demonstrating that the observed phenotypes are not caused by  
625 artifacts due to mutant selection on 10 % sucrose. Fig 1a, 2, 3 and 4 contain data  
626 from one set of mutants while Fig 1b and 6 contain data from an independent set.

627 **Construction of *sux* genes for functional complementation of *sux* mutants**

628 Functional complementation was performed using primers listed in S4 Table.  
629 Expression of *suxA*, *suxR*, *suxB* and *suxC* were made by cloning either the *lacZ*  
630 promoter or native promoters into the corresponding mutants. For *suxB*, the native  
631 promoter for the *suxAB* operon was fused to the *suxB* coding sequence by overlap  
632 extension PCR. All nucleotide sequences were amplified by PCR from PXO99<sup>A</sup>  
633 genomic DNA and cloned into pGEM-T (Promega). These intermediate constructs  
634 were verified by sequencing. Coding regions with or without promoter regions were  
635 subcloned into pHM1 containing the *lacZ* promoter (77). The  $\Delta$ *suxA*,  $\Delta$ *suxB*,  
636  $\Delta$ *suxC*, and  $\Delta$ *suxR* strains were each used as the recipients for the above  
637 recombinant plasmids. Transformants harboring the recombinant plasmids were  
638 selected on solid NA plates with appropriate antibiotics. Complemented strains  
639 were confirmed by PCR amplification with the corresponding gene-specific primer  
640 pairs.

641 **OD<sub>600</sub> and CFU/mL measurements**

642 OD<sub>600</sub> was used as a proxy for bacterial growth either using a plate reader (e.g.,  
643 growth curves) or a spectrophotometer. The corresponding CFU/mL was  
644 determined (S6 Table).

645 **RNA isolation and quantitative RT-PCR from *Xoo* cells from *in vitro* culture**  
646 **medium**

647 Cells from *in vitro* cultures (OD<sub>600</sub> ~2.0 for stationary phase or as specified for 2, 4,  
648 6 and 8 hours of bacterial growth (S11 Fig.)) were harvested and washed twice  
649 with sterile water prior to RNA extraction. Total bacterial RNA was extracted using  
650 TRIZOL (Invitrogen, Carlsbad, CA, USA) according to manufacturer's instructions.  
651 Total RNA (1  $\mu$ g) was treated with DNase I (Thermo Scientific, Carlsbad, CA, USA)  
652 and used for cDNA synthesis using iScript cDNA Synthesis (Bio-Rad Laboratories,  
653 USA). cDNA derived from 25 ng of total RNA was used for each quantitative real-  
654 time PCR (qRT-PCR) reaction with gene-specific primers listed in S4 Table.  
655 Ribosomal 16S RNA expression was used as an internal control. The qRT-PCR  
656 was performed on a Stratagene Mx4000 multiplex quantitative PCR system using  
657 iQSYBRGreenSupermix (Bio-Rad, Hercules, USA). The average cycle threshold  
658 (Ct) was used to determine candidate gene transcript levels. The 2<sup>- $\Delta\Delta$ Ct</sup> method  
659 was used for relative quantification using 16S rRNA as reference. The Ct values  
660 of 16S rRNA were in a similar range as those of the candidate genes (S5 Table),  
661 and the reference gene 16S rRNA has also been used in other studies (78).  
662 qRT-PCR was performed and transcript level was determined relative to 16S  
663 rRNA. For *in vitro* data, transcript levels were then normalized to the control,  
664 and the control value was shown (at 1 for PXO99<sup>A</sup> no sugar) with errors and the data  
665 in the mutants or in presence of sugar. For *in planta* data, transcript levels were  
666 then normalized to the control, and the control value was shown (for 0 day) with  
667 errors and the data at 3, 5, 7 and 10 days.  
668

669 **RNA isolation and quantitative RT-PCR from *Xoo* cells from rice leave**



670 Four-week-old rice plants, cv. Kitaake, were inoculated by clipping the leaf tips with  
671 scissors dipped in bacterial suspension ( $OD_{600} \sim 0.5$ ). Infected rice plants were kept  
672 in a growth chamber under 12-h light at 28 °C and 12-h dark at 25 °C. Leaf  
673 segments (3 cm) were collected at 0, 3, 5, 7 and 10 days after infection (DAI). Total  
674 RNA was extracted using TRIZOL (Invitrogen, Carlsbad, CA, USA) according to  
675 manufacturer's instructions. Total RNA (1  $\mu$ g) was treated with DNase I (Thermo  
676 Scientific, Carlsbad, CA, USA) and used for cDNA synthesis using Maxima™ H  
677 Minus cDNA Synthesis Master Mix, with dsDNase (Thermo Scientific, Carlsbad,  
678 CA, USA). cDNA derived from 25 ng of total RNA was used for each quantitative  
679 real-time (qRT-PCR) reaction with gene-specific primers listed in S4 Table.  
680 Ribosomal 16S RNA expression was used as an internal control with the gene-  
681 specific primers. The qRT-PCR was performed on Applied Biosystems 7500/7500  
682 Fast Real-Time PCR System (Applied Biosystems, USA) using SYBR Fast  
683 Universal kit (Kapa Biosystems). The average threshold cycle (Ct) was used to  
684 determine the gene expression. The  $2^{-\Delta\Delta Ct}$  method was used for relative  
685 quantification (78).

#### 686 **Observation of bacterial colony morphology and quantification of EPS**

687 Deletion mutants and wild-type PXO99<sup>A</sup> were grown on solid NA medium (plates  
688 were not inverted) and resuspended into liquid NB media to an  $OD_{600} \sim 0.2$ , then 2  
689  $\mu$ L of the bacterial suspension was dropped on solid medium with or without added  
690 sugars as specified for spot assays. Bacterial colonies were photographed after 2,  
691 3, 4, 5 or 7 days at 28 °C as specified and phenotype of colonies was recorded by  
692 vertical photography. Colony morphology was also assessed by recording the  
693 colony cohesion when bacteria were grown on inverted plates. Droplet formation  
694 indicated reduced EPS production. Phenotype of colonies was recorded by  
695 horizontal photography. EPS was quantified as previously described (79). Briefly,  
696 10-mL bacterial cultures were grown in liquid NB with or without added sugar for 2  
697 days at 28 °C. At  $OD_{600} \sim 2.3$ , cells were harvested by centrifugation (8,000 g for  
698 10 min). KCl solution (400  $\mu$ L, 3.4 M) was added to the supernatants followed by  
699 2 volumes of absolute ethanol. The mixture was incubated at -20 °C for 30 minutes.  
700 The precipitated EPS was harvested by centrifugation (10,000 g for 10 min) and  
701 dried at 55 °C overnight before measuring weights. DSF supplementation was  
702 performed by adding with 5  $\mu$ M of *cis*-11-methyl-2-dodecenoic acid (Sigma) to the  
703 media.

#### 704 **Determination of bacterial growth**

705 Bacteria were grown in 96-well, flat-bottom, transparent plates with 200  $\mu$ L of liquid  
706 NB or minimal media and inoculated with Xoo at  $OD_{600} \sim 0.15$ . Non-inoculated wells  
707 were used for background subtraction. The  $OD_{600}$  was measured every 30 min for  
708 2 days at 28 °C using a plate reader (Tecan). Prior to measurements cells were  
709 mixed by shaking for 5 seconds.

#### 710 **Sucrose uptake into Xoo using FRET sensors**

711 Xoo cultures were transformed by electroporation with a plasmid encoding  
712 FLIPsuc-90 $\mu$  $\Delta$ 1V (ref. (56)) under the control of the neomycin promoter. Xoo cells  
713 were grown for 2-3 days at 28-30 °C in solid media containing antibiotics for

714 selection. Single colonies were used to inoculate 5 mL TS medium (10 g tryptone,  
715 1g glutamic acid and 10 g sucrose per liter) containing the appropriate antibiotic.  
716 *Xoo* transformants were grown for 2 days at 28-30 °C. The 5-mL cultures were  
717 used to inoculate 100 mL liquid TS medium containing the appropriate antibiotic.  
718 At OD<sub>600</sub> ~0.3-0.4, the cells were harvested by centrifugation (3,000 g for 10 min)  
719 and the cell pellets were resuspended in M9 medium (0.1 M MOPS, 1 mM MgSO<sub>4</sub>,  
720 1 mM CaCl<sub>2</sub>, 0.1 % NH<sub>4</sub>Cl, 0.05 % NaCl, 0.3 % KH<sub>2</sub>PO<sub>4</sub>, 0.6 % Na<sub>2</sub>HPO<sub>4</sub>) to OD<sub>600</sub>  
721 ~1.3-1.4. eCFP and eYFP fluorescence intensity was recorded in a 96-well, flat-  
722 bottom transparent plate (excitation 428 and 505 nm; emission at 470 and 535 nm)  
723 using a fluorometer microplate reader (Tecan Spark, Männedorf  
724 Switzerland). Kinetic experiments were performed by measuring 5 initial cycles  
725 without sucrose followed by 5 cycles after addition of 2 µL of 1 M sucrose to 200  
726 µL of the cell suspensions (*i.e.*, final concentrations of 10 mM sucrose). Non-  
727 transformed *Xoo* cells were used to subtract cell-specific background in  
728 subsequent data analyses.

### 729 **Swimming motility assays**

730 Motility assays were conducted on soft agar (0.3 % w/v) essentially as described  
731 (80). *Xoo* cells were grown in liquid NB at 28 °C and 2 µL of culture (0.1 OD<sub>600</sub>)  
732 was dropped on solid NA with 1 % sucrose. The diameters of the swimming motility  
733 zones were measured after incubation at 28 °C on uninverted plates for 1, 2, 3, 5  
734 and 7 days as specified and phenotype of colonies was recorded by vertical  
735 photography.

### 736 **Swarming motility assays**

737 Motility assays were undertaken on 0.6 % agar (w/v). *Xoo* cells were grown on  
738 liquid NB at 28 °C and 2 µL of culture (0.1 OD<sub>600</sub>) was dropped onto plate  
739 containing NA with 1 % sucrose. The diameters of the swarming motility zones  
740 were measured after incubation at 28 °C on uninverted plates for 1, 2, 3, 5 and 7  
741 days as specified and phenotype of colonies was recorded by vertical  
742 photography.

### 743 **Analysis of biofilm formation**

744 Biofilm formation and quantification assays were performed by growing *Xoo* to  
745 logarithmic phase. 5 mL of culture (0.1 OD<sub>600</sub>) was then incubated at 28 °C for 72  
746 h in static glass tubes (qualitative assays) or 96-well, flat-bottom transparent plates  
747 (quantitative assays). Medium and cells in solution were removed and the biofilm  
748 component was washed twice with water and stained with 0.1 % crystal violet (CV,  
749 w/v) solution for 48 h. Stained biofilms were further washed three times with water.  
750 Pictures were taken (glass tubes) or crystal violet amounts were quantified (96-  
751 well plates). For quantification, the bound crystal violet was dissolved in ethanol  
752 and read at 595 nm (absorbance maximum of crystal violet) with a microplate  
753 reader (Tecan Spark).

### 754 **Disease assays in rice leaves**

755 The *japonica* rice cv. Nipponbare was grown in a chamber under a cycle of 12 h  
756 of light at 28 °C and 12 h of dark at 25 °C. Four-week-old rice plants were

757 inoculated with bacterial suspensions in sterile distilled water at approximately  
758 OD<sub>600</sub> ~0.5 using leaf tip-clipping. Lesion lengths were measured 12 DAI (81).

### 759 **Building of the phylogenetic tree of the *sux* gene cluster**

760 Prior to phylogenetic tree construction, the *sux* coding sequences were artificially  
761 condensed following the same vectorial orientation, namely *suxR*, *suxC*, *suxA* and  
762 *suxB*. This analysis was done to roughly estimate the conservation of the *sux* gene  
763 cluster in *Xanthomonas* spp. Given the variability of the intergenic region, the  
764 condensed DNA sequences of the *sux* cluster were artificially generated. The  
765 phylogenetic tree was inferred from the condensed *sux* gene cluster sequences of  
766 14 *Xanthomonas* spp.: *X. arboricola* pv. *juglandis*, *X. citri* pv. *malvacearum*, *X.*  
767 *vasicola* pv. *vasculorum*, *X. cucurbitae*, *X. phaseoli*, *X. oryzae* pv. *oryzicola*, *X.*  
768 *oryzae* pv. *oryzae*, *X. hortorum*, *X. fragariae*, *X. campestris* pv. *vesicatoria*, *X.*  
769 *vesicatoria*, *X. campestris* pv. *campestris*, *X. translucens* pv. *translucens*, and *X.*  
770 *albilineans*. The unweighted pair group method with arithmetic mean (UPGMA)  
771 (Mitchener & Sokal 1957) was used and based on the Tamura-Nei model. The tree  
772 was calculated from a global alignment performed from pairwise alignment of all  
773 sequence pairs using Geneious (<https://www.geneious.com/>).

### 774 **Statistics**

775 In all experiments, at minimum, three independent experiments were performed  
776 with three biological replicates each. Significance was calculated between two  
777 groups using unpaired two-tailed Student's *t*-Test at the 95 % confidence level and  
778 Welch's correction of unequal variances. For infection experiments, at least 7  
779 leaves from five plants were used per strain.

### 780 **Figure preparation**

781 Some figure sections were generated with Biorender (<https://biorender.com/>).

### 782 **Acknowledgments**

783 We would like to thank Boris Szurek for advising the Frommer team on *Xoo*  
784 transformation. We would like to thank Susanne Paradies for excellent technical  
785 assistance. This work was supported by grants from the Bill and Melinda Gates  
786 Foundation to HHU (WF), with a subcontract to MU (BY), the Deutsche  
787 Forschungsgemeinschaft (DFG, German Research Foundation) under Germany's  
788 Excellence Strategy – EXC-2048/1 – project ID 390686111, and the Alexander von  
789 Humboldt Professorship (WF). YA is supported by a fellowship from the Alexander  
790 von Humboldt Foundation.

### 791 **Funding statement**

792 The work presented here was supported by: WF: project ID 390686111 (Bill and  
793 Melinda Gates Foundation; [www.gatesfoundation.org](http://www.gatesfoundation.org)), project ID 390686111  
794 (Deutsche Forschungsgemeinschaft, German Research Foundation under  
795 Germany's Excellence Strategy EXC-2048/1; [www.dfg.de](http://www.dfg.de)), (Alexander von  
796 Humboldt Professorship; [www.humboldt-foundation.de](http://www.humboldt-foundation.de)). BY: project ID  
797 390686111 (subcontract to HHU, funds from Bill and Melinda Gates Foundation).  
798 YA: Fellowship (Alexander von Humboldt fellowship). The funders had no role in

799 study design, data collection and analysis, decision to publish, or preparation of  
800 the manuscript.

## 801 References

- 802 1. Savary S, Willocquet L, Pethybridge SJ, Esker P, McRoberts N, Nelson A. The  
803 global burden of pathogens and pests on major food crops. *Nat Ecol Evol.*  
804 2019;3(3):430–9.
- 805 2. Shekhar S, Sinha D, Kumari A. An Overview of bacterial leaf blight disease of  
806 rice and different strategies for its management. *Int J Curr Microbiol App Sci.*  
807 2020;9(4):2250–65.
- 808 3. Ou SH. Rice diseases. IRRI; 1985.
- 809 4. McCully ME. Niches for bacterial endophytes in crop plants: a plant biologist's  
810 view. *Funct Plant Biol.* 2001;28(9):983–90.
- 811 5. Peuke AD, Rokitta M, Zimmermann U, Schreiber L, Haase A. Simultaneous  
812 measurement of water flow velocity and solute transport in xylem and phloem of adult  
813 plants of *Ricinus communis* over a daily time course by nuclear magnetic resonance  
814 spectrometry. *Plant Cell Environ.* 2001;24(5):491–503.
- 815 6. Tyree MT, Zimmermann MH. Xylem structure and the ascent of sap. Springer  
816 Science & Business Media; 2013.
- 817 7. Lowe-Power TM, Khokhani D, Allen C. How *Ralstonia solanacearum* exploits  
818 and thrives in the flowing plant xylem environment. *Trends Microbiol.* 2018  
819 Nov;26(11):929–42.
- 820 8. Dalsing BL, Truchon AN, Gonzalez-Orta ET, Milling AS, Allen C. *Ralstonia*  
821 *solanacearum* uses inorganic nitrogen metabolism for virulence, ATP production, and  
822 detoxification in the oxygen-limited host xylem environment. *MBio.* 2015;6(2):e02471-  
823 14.
- 824 9. Lowe-Power TM, Khokhani D, Allen C. How *Ralstonia solanacearum* exploits  
825 and thrives in the flowing plant xylem environment. *Trends Immunol.* 2018;26(11):929–  
826 42.
- 827 10. Jacobs JM, Babujee L, Meng F, Milling A, Allen C. The *in planta* transcriptome  
828 of *Ralstonia solanacearum*: conserved physiological and virulence strategies during  
829 bacterial wilt of tomato. *MBio.* 2012;3(4):e00114-12.
- 830 11. Bogs J, Geider K. Molecular analysis of sucrose metabolism of *Erwinia*  
831 *amylovora* and influence on bacterial virulence. *J Bacteriol.* 2000;182(19):5351–8.
- 832 12. Hamilton CD, Steidl OR, MacIntyre AM, Hendrich CG, Allen C. *Ralstonia*  
833 *solanacearum* depends on catabolism of myo-inositol, sucrose, and trehalose for  
834 virulence in an infection stage-dependent manner. *Mol Plant-Microbe Interact.* 2021;(ja).
- 835 13. Yadeta K, Thomma B. The xylem as battleground for plant hosts and vascular  
836 wilt pathogens. *Front Plant Sci* [Internet]. 2013 [cited 2021 Mar 17];4. Available from:  
837 <https://www.frontiersin.org/articles/10.3389/fpls.2013.00097/full>
- 838 14. Noda T, Kaku H. Growth of *Xanthomonas oryzae* pv. *oryzae* *in planta* and in  
839 guttation fluid of rice. *Jap J Phytopathol.* 1999;65(1):9–14.
- 840 15. Wang J, Guo J, Wang S, Zeng Z, Zheng D, Yao X, et al. The global strategy  
841 employed by *Xanthomonas oryzae* pv. *oryzae* to conquer low-oxygen tension. *J*  
842 *Proteomics.* 2017;161:68–77.
- 843 16. Tsuge S, Nishida M, Furutani A, Yasuyuki K, Horino O. Growth of glucose-  
844 uptake-deficient mutant of *Xanthomonas oryzae* pv. *oryzae* in rice leaves. *J Gen Plant*

- 845 Pathol. 2001;67(2):144–7.  
846 17. Eom J-S, Luo D, Atienza-Grande G, Yang J, Ji C, Huguet-Tapia JC, et al.  
847 Diagnostic kit for rice blight resistance. Nat Biotechnol. 2019;37(11):1372–9.  
848 18. Meng Y, Li Y, Galvani CD, Hao G, Turner JN, Burr TJ, et al. Upstream migration  
849 of *Xylella fastidiosa* via pilus-driven twitching motility. J Bacteriol. 2005;187(16):5560–  
850 7.  
851 19. Yang B, White FF. Diverse members of the AvrBs3/PthA family of type III  
852 effectors are major virulence determinants in bacterial blight disease of rice. Mol Plant  
853 Microbe Interact. 2004;17(11):1192–200.  
854 20. Yang B, Sugio A, White FF. *Os8N3* is a host disease-susceptibility gene for  
855 bacterial blight of rice. Proc Natl Acad Sci USA. 2006 Jul 5;103(27):10503–8.  
856 21. Kay S, Bonas U. How *Xanthomonas* type III effectors manipulate the host plant.  
857 Curr Opin Microbiol. 2009 Feb 1;12(1):37–43.  
858 22. Zhou J, Peng Z, Long J, Sosso D, Liu B, Eom J-S, et al. Gene targeting by the  
859 TAL effector PthXo2 reveals cryptic resistance gene for bacterial blight of rice. Plant J.  
860 2015;82(4):632–43.  
861 23. Kharadi RR, Sundin GW. Dissecting the process of xylem colonization through  
862 biofilm formation in *Erwinia amylovora*. J Plant Pathol. 2020;1–9.  
863 24. Iyer R, Camilli A. Sucrose metabolism contributes to in vivo fitness of  
864 *Streptococcus pneumoniae*. Mol Microbiol. 2007;66(1):1–13.  
865 25. Lee B-M, Park Y-J, Park D-S, Kang H-W, Kim J-G, Song E-S, et al. The genome  
866 sequence of *Xanthomonas oryzae* pathovar *oryzae* KACC10331, the bacterial blight  
867 pathogen of rice. Nucl Acids Res. 2005;33(2):577–86.  
868 26. He Y-W, Wu J, Cha J-S, Zhang L-H. Rice bacterial blight pathogen *Xanthomonas*  
869 *oryzae* pv. *oryzae* produces multiple DSF-family signals in regulation of virulence factor  
870 production. BMC Microbiol. 2010;10(1):1–9.  
871 27. Devos S, Van Oudenhove L, Stremersch S, Van Putte W, De Rycke R, Van  
872 Driessche G, et al. The effect of imipenem and diffusible signaling factors on the  
873 secretion of outer membrane vesicles and associated Ax21 proteins in *Stenotrophomonas*  
874 *maltophilia*. Front Microbiol. 2015;6:298.  
875 28. Loh J, Pierson EA, Pierson III LS, Stacey G, Chatterjee A. Quorum sensing in  
876 plant-associated bacteria. Curr Opin Plant Biol. 2002;5(4):285–90.  
877 29. Ryan RP, An S, Allan JH, McCarthy Y, Dow JM. The DSF family of cell–cell  
878 signals: an expanding class of bacterial virulence regulators. PLoS Pathog.  
879 2015;11(7):e1004986.  
880 30. Emge P, Moeller J, Jang H, Rusconi R, Yawata Y, Stocker R, et al. Resilience of  
881 bacterial quorum sensing against fluid flow. Scientific Reports. 2016;6(1):1–10.  
882 31. Samal B, Chatterjee S. New insight into bacterial social communication in natural  
883 host: Evidence for interplay of heterogeneous and unison quorum response. PLoS  
884 genetics. 2019;15(9):e1008395.  
885 32. Zheng D, Yao X, Duan M, Luo Y, Liu B, Qi P, et al. Two overlapping two-  
886 component systems in *Xanthomonas oryzae* pv. *oryzae* contribute to full fitness in rice by  
887 regulating virulence factors expression. Sci Rep. 2016;6(1):1–13.  
888 33. Killiny N, Martinez RH, Dumenyo CK, Cooksey DA, Almeida RPP. The  
889 exopolysaccharide of *Xylella fastidiosa* Is essential for biofilm formation, plant virulence,  
890 and vector transmission. Mol Plant Microbe Interact. 2013 Sep 1;26(9):1044–53.

- 891 34. Danhorn T, Fuqua C. Biofilm formation by plant-associated bacteria. *Annu Rev*  
892 *Microbiol.* 2007;61:401–22.
- 893 35. Koczán JM, McGrath MJ, Zhao Y, Sundin GW. Contribution of *Erwinia*  
894 *amylovora* exopolysaccharides amylovoran and levan to biofilm formation: implications  
895 in pathogenicity. *Phytopathol.* 2009 Nov;99(11):1237–44.
- 896 36. Katzen F, Ferreiro DU, Oddo CG, Ielmini MV, Becker A, Pühler A, et al.  
897 *Xanthomonas campestris* pv. *campestris* gum mutants: Effects on xanthan biosynthesis  
898 and plant virulence. *J Bacteriol.* 1998 Apr;180(7):1607–17.
- 899 37. Hunjan MS, Singh PP, Lore JS. Extracellular polysaccharide production  
900 underlining aggressiveness of *Xanthomonas oryzae* pv. *oryzae* infecting rice. *Indian*  
901 *Phytopathol.* 2015;68(1):120–2.
- 902 38. Dharmapuri S, Sonti RV. A transposon insertion in the gumG homologue of  
903 *Xanthomonas oryzae* pv. *oryzae* causes loss of extracellular polysaccharide production  
904 and virulence. *FEMS Microbiol Lett.* 1999;179(1):53–9.
- 905 39. Triplett LR, Hamilton JP, Buell CR, Tisserat NA, Verdier V, Zink F, et al.  
906 Genomic analysis of *Xanthomonas oryzae* isolates from rice grown in the United States  
907 reveals substantial divergence from known *X. oryzae* pathovars. *Appl Environ Microbiol.*  
908 2011;77(12):3930–7.
- 909 40. Oliva R, Ji C, Atienza-Grande G, Hugué-Tapia JC, Pérez-Quintero A, Li T, et al.  
910 Broad-spectrum resistance to bacterial blight in rice using genome editing. *Nat*  
911 *Biotechnol.* 2019;37(11):1344–50.
- 912 41. Jeena GS, Kumar S, Shukla RK. Structure, evolution and diverse physiological  
913 roles of SWEET sugar transporters in plants. *Plant Mol Biol.* 2019 Jul 1;100(4):351–65.
- 914 42. Zaka A, Grande G, Coronejo T, Quibod IL, Chen C-W, Chang S-J, et al. Natural  
915 variations in the promoter of *OsSWEET13* and *OsSWEET14* expand the range of  
916 resistance against *Xanthomonas oryzae* pv. *oryzae*. Sundaram RM, editor. *PLoS one.*  
917 2018 Sep 13;13(9):e0203711.
- 918 43. Chen L-Q, Hou B-H, Lalonde S, Takanaga H, Hartung ML, Qu X-Q, et al. Sugar  
919 transporters for intercellular exchange and nutrition of pathogens. *Nature.*  
920 2010;468(7323):527.
- 921 44. Chen L-Q. SWEET sugar transporters for phloem transport and pathogen  
922 nutrition. *New Phytol.* 2014;201(4):1150–5.
- 923 45. Chandran D. Co-option of developmentally regulated plant SWEET transporters  
924 for pathogen nutrition and abiotic stress tolerance. *IUBMB life.* 2015;67(7):461–71.
- 925 46. Yu Y, Streubel J, Balzergue S, Champion A, Boch J, Koebnik R, et al.  
926 Colonization of rice leaf blades by an African strain of *Xanthomonas oryzae* pv. *oryzae*  
927 depends on a new TAL effector that induces the rice nodulin-3 Os11N3 gene. *Mol Plant*  
928 *Microbe Interact.* 2011;24(9):1102–13.
- 929 47. Oliva R, Ji C, Atienza-Grande G, Hugué-Tapia JC, Pérez-Quintero A, Li T, et al.  
930 Broad-spectrum resistance to bacterial blight in rice using genome-editing. *Nat*  
931 *Biotechnol.* 2019;37:1344–50.
- 932 48. Eom J-S, Luo D, Atienza-Grande G, Yang J, Ji C, Luu VT, et al. Diagnostic kit  
933 for rice blight resistance. *Nat Biotechnol.* 2019;37:1372–9.
- 934 49. Bezruczyk M, Yang J, Eom J-S, Prior M, Sosso D, Hartwig T, et al. Sugar flux  
935 and signaling in plant-microbe interactions. *Plant J.* 2018 Feb;93(4):675–85.
- 936 50. Streubel J, Pesce C, Hutin M, Koebnik R, Boch J, Szurek B. Five

- 937 phylogenetically close rice *SWEET* genes confer TAL effector-mediated susceptibility to  
938 *Xanthomonas oryzae* pv. *oryzae*. *New Phytol.* 2013;200(3):808–19.
- 939 51. Blanvillain S, Meyer D, Boulanger A, Lautier M, Guynet C, Denancé N, et al.  
940 Plant carbohydrate scavenging through TonB-dependent receptors: a feature shared by  
941 phytopathogenic and aquatic bacteria. *PLoS one.* 2007;2(2):e224.
- 942 52. Kim H-S, Park H-J, Heu S, Jung J. Molecular and functional characterization of a  
943 unique sucrose hydrolase from *Xanthomonas axonopodis* pv. *glycines*. *J Bacteriol.*  
944 2004;186(2):411–8.
- 945 53. Cohn M, Bart RS, Shybut M, Dahlbeck D, Gomez M, Morbitzer R, et al.  
946 *Xanthomonas axonopodis* virulence is promoted by a transcription activator-like  
947 effector-mediated induction of a *SWEET* sugar transporter in cassava. *Mol Plant*  
948 *Microbe Interact.* 2014;27(11):1186–98.
- 949 54. Novichkov PS, Laikova ON, Novichkova ES, Gelfand MS, Arkin AP, Dubchak I,  
950 et al. RegPrecise: a database of curated genomic inferences of transcriptional regulatory  
951 interactions in prokaryotes. *Nucleic Acids Res.* 2010;38(suppl\_1):D111–8.
- 952 55. Yuan W. Culture medium for *Xanthomonas campestris* pv. *oryzae*. *J Appl*  
953 *Microbiol.* 1990;69(6):798–805.
- 954 56. Lager I, Looger LL, Hilpert M, Lalonde S, Frommer WB. Conversion of a  
955 putative *Agrobacterium* sugar-binding protein into a FRET sensor with high selectivity  
956 for sucrose. *J Biol Chem.* 2006 Oct 13;281(41):30875–83.
- 957 57. Liu A, Mi Z-H, Zheng X-Y, Yu Y, Su H-N, Chen X-L, et al. Exopolysaccharides  
958 play a role in the swarming of the benthic bacterium *Pseudoalteromonas* sp. SM9913.  
959 *Frontiers in microbiology.* 2016;7:473.
- 960 58. Wang X-Y, Zhou L, Yang J, Ji G-H, He Y-W. The RpfB-dependent quorum  
961 sensing signal turnover system is required for adaptation and virulence in rice bacterial  
962 blight pathogen *Xanthomonas oryzae* pv. *oryzae*. *Mol Plant Microbe Interact.*  
963 2016;29(3):220–30.
- 964 59. Yang F, Tian F, Chen H, Hutchins W, Yang C-H, He C. The *Xanthomonas oryzae*  
965 pv. *oryzae* PilZ domain proteins function differentially in cyclic di-GMP binding and  
966 regulation of virulence and motility. *Applied and environmental microbiology.*  
967 2015;81(13):4358–67.
- 968 60. Yu C, Nguyen D-P, Yang F, Shi J, Wei Y, Tian F, et al. Transcriptome Analysis  
969 Revealed Overlapping and Special Regulatory Roles of RpoN1 and RpoN2 in Motility,  
970 Virulence, and Growth of *Xanthomonas oryzae* pv. *oryzae*. *Front Microbiol.*  
971 2021;12:453.
- 972 61. Dharmapuri S, Sonti RV. A transposon insertion in the *gumG* homologue of  
973 *Xanthomonas oryzae* pv. *oryzae* causes loss of extracellular polysaccharide production  
974 and virulence. *FEMS Microbiol Lett.* 1999;179(1):53–9.
- 975 62. Tyree MT, Zimmermann MH. Xylem structure and the ascent of sap. 2nd ed.  
976 Berlin ; New York: Springer-Verlag; 2002. 283 p. (Springer series in wood science).
- 977 63. Jahreis K, Bentler L, Bockmann J, Hans S, Meyer A, Siepelmeyer J, et al.  
978 Adaptation of sucrose metabolism in the *Escherichia coli* wild-type strain EC3132. *J*  
979 *Bacteriol.* 2002;184(19):5307–16.
- 980 64. Cox KL, Meng F, Wilkins KE, Li F, Wang P, Booher NJ, et al. TAL effector  
981 driven induction of a *SWEET* gene confers susceptibility to bacterial blight of cotton. *Nat*  
982 *Commun.* 2017;8(1):1–14.

- 983 65. Zhu J, Beaver JW, Moré MI, Fuqua C, Eberhard A, Winans SC. Analogs of the  
984 autoinducer 3-oxooctanoyl-homoserine lactone strongly inhibit activity of the TraR  
985 protein of *Agrobacterium tumefaciens*. J Bacteriol. 1998 Oct;180(20):5398–405.
- 986 66. Collins CH, Arnold FH, Leadbetter JR. Directed evolution of *Vibrio fischeri*  
987 LuxR for increased sensitivity to a broad spectrum of acyl-homoserine lactones. Mol  
988 Microbiol. 2005;55(3):712–23.
- 989 67. Moore JD, Rossi FM, Welsh MA, Nyffeler KE, Blackwell HE. A comparative  
990 analysis of synthetic quorum sensing modulators in *Pseudomonas aeruginosa*: new  
991 insights into mechanism, active efflux susceptibility, phenotypic response, and next-  
992 generation ligand design. J Am Chem Soc. 2015 Nov 25;137(46):14626–39.
- 993 68. Wellington S, Greenberg EP. Quorum sensing signal selectivity and the potential  
994 for interspecies cross talk. mBio. 2019 Mar 5;10(2):e00146-19.
- 995 69. Cheng Z, He Y-W, Lim SC, Qamra R, Walsh MA, Zhang L-H, et al. Structural  
996 basis of the sensor-synthase interaction in autoinduction of the quorum sensing signal  
997 DSF biosynthesis. Structure. 2010;18(9):1199–209.
- 998 70. Yang F, Xue D, Tian F, Hutchins W, Yang C-H, He C. Identification of c-di-  
999 GMP signaling components in *Xanthomonas oryzae* and their orthologs in Xanthomonads  
1000 involved in regulation of bacterial virulence expression. Front Microbiol. 2019;10:1402.
- 1001 71. Cho J-H, Yoon J-M, Lee S-W, Noh Y-H, Cha J-S. *Xanthomonas oryzae* pv.  
1002 *oryzae* RpfE regulates virulence and carbon source utilization without change of the dsf  
1003 production. Plant Pathol J. 2013;29(4):364.
- 1004 72. Samal B, Chatterjee S. New insight into bacterial social communication in natural  
1005 host: Evidence for interplay of heterogeneous and unison quorum response. PLoS Genet.  
1006 2019;15(9):e1008395.
- 1007 73. Misselwitz B, Barrett N, Kreibich S, Vonaesch P, Andritschke D, Rout S, et al.  
1008 Near surface swimming of *Salmonella Typhimurium* explains target-site selection and  
1009 cooperative invasion. PLoS Pathog. 2012;8(7):e1002810.
- 1010 74. Ausubel FM, Brent R, Kingston RE, Moore DD, Seidman JG, Smith JA, et al.  
1011 Current protocols in molecular biology. VB Chanda, series ed. New York: John Wiley &  
1012 Sons; 1998.
- 1013 75. Song C, Yang B. Mutagenesis of 18 type III effectors reveals virulence function  
1014 of XopZ(PXO99) in *Xanthomonas oryzae* pv. *oryzae*. Mol Plant Microbe Interact.  
1015 2010;23(7):893–902.
- 1016 76. Zhao S, Mo W-L, Wu F, Tang W, Tang J-L, Szurek B, et al. Identification of non-  
1017 TAL effectors in *Xanthomonas oryzae* pv. *oryzae* Chinese strain 13751 and analysis of  
1018 their role in the bacterial virulence. World J Microbiol Biotechnol. 2013;29(4):733–44.
- 1019 77. Zou L, Li Y, Chen G. A non-marker mutagenesis strategy to generate poly-*hrp*  
1020 gene mutants in the rice pathogen *Xanthomonas oryzae* pv. *oryzicola*. Agric Sci China.  
1021 2011 Aug 1;10(8):1139–50.
- 1022 78. Livak KJ, Schmittgen TD. Analysis of relative gene expression data using real-  
1023 time quantitative PCR and the 2<sup>-</sup> ΔΔCT method. Methods. 2001;25(4):402–8.
- 1024 79. Amikam D, Galperin MY. PilZ domain is part of the bacterial c-di-GMP binding  
1025 protein. Bioinformatics. 2006;22(1):3–6.
- 1026 80. González JF, Myers MP, Venturi V. The inter-kingdom solo OryR regulator of  
1027 *Xanthomonas oryzae* is important for motility. Mol Plant Pathol. 2013;14(3):211–21.
- 1028 81. Kauffman HE. An improved technique for evaluating resistance of rice varieties



- 1029 to *Xanthomonas oryzae*. Plant Dis Rep. 1973;57:537–41.  
1030 82. Slater H, Alvarez-Morales A, Barber CE, Daniels MJ, Dow JM. A two-  
1031 component system involving an HD-GYP domain protein links cell–cell signalling to  
1032 pathogenicity gene expression in *Xanthomonas campestris*. Mol Microbiol.  
1033 2000;38(5):986–1003.  
1034 83. Azimi S, Klementiev AD, Whiteley M, Diggle SP. Bacterial quorum sensing  
1035 during infection. Annu Rev Microbiol. 2020;74:201–19.  
1036  
1037

WITHDRAWN  
see manuscript DOI for details

1038 **Figures and Tables**  
 1039  
 1040

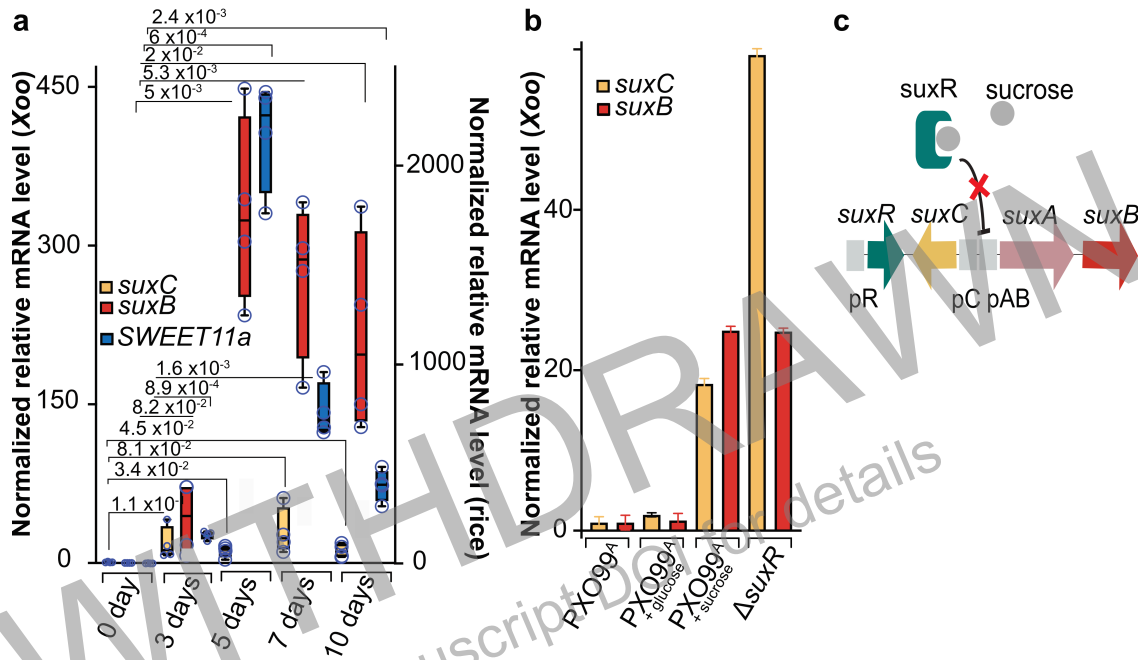

1041  
 1042  
 1043 **Figure 1. Transcript levels of *Sux* genes *in vitro* and *in planta* and role of the**  
 1044 **repressor *SuxR*.** **a.** *sux* transcript levels in PXO99<sup>A</sup> and *SWEET11a* in rice during  
 1045 infection of rice cultivar Kitaake as determined by qRT-PCR (0, 3, 5, 7 and 10 days  
 1046 after infection in Kitaake). **b.** qRT-PCR analyses of *suxB* and *suxC* mRNA levels  
 1047 in *Xoo* growing on NBN, NBN + 1 % sucrose and NBN + 1 % glucose and in  
 1048 presence or absence of *SuxR* repression ( $\Delta$ *suxR*). **c.** Proposed model of regulation  
 1049 of *suxC* and *suxB* by *SuxR*. Boxes extend from 25th to 75th percentiles and display  
 1050 median values as center lines. Whiskers plot minimum and maximum values and  
 1051 individual data points. Significance was calculated between two groups using  
 1052 unpaired two-tailed Student's *t*-Test at the 95 % confidence level and Welch's  
 1053 correction of unequal variances. The  $2^{-\Delta\Delta Ct}$  method was used for relative  
 1054 quantification using 16S rRNA as reference. Transcript levels were then  
 1055 normalized to the control, and the control value was shown (at 1 PXO99<sup>A</sup> no sugar  
 1056 for *in vitro* and 0 day for *in planta*). Comparable results were obtained in three  
 1057 independent experiments. See also S1, S2 and S3 Figures.

1058

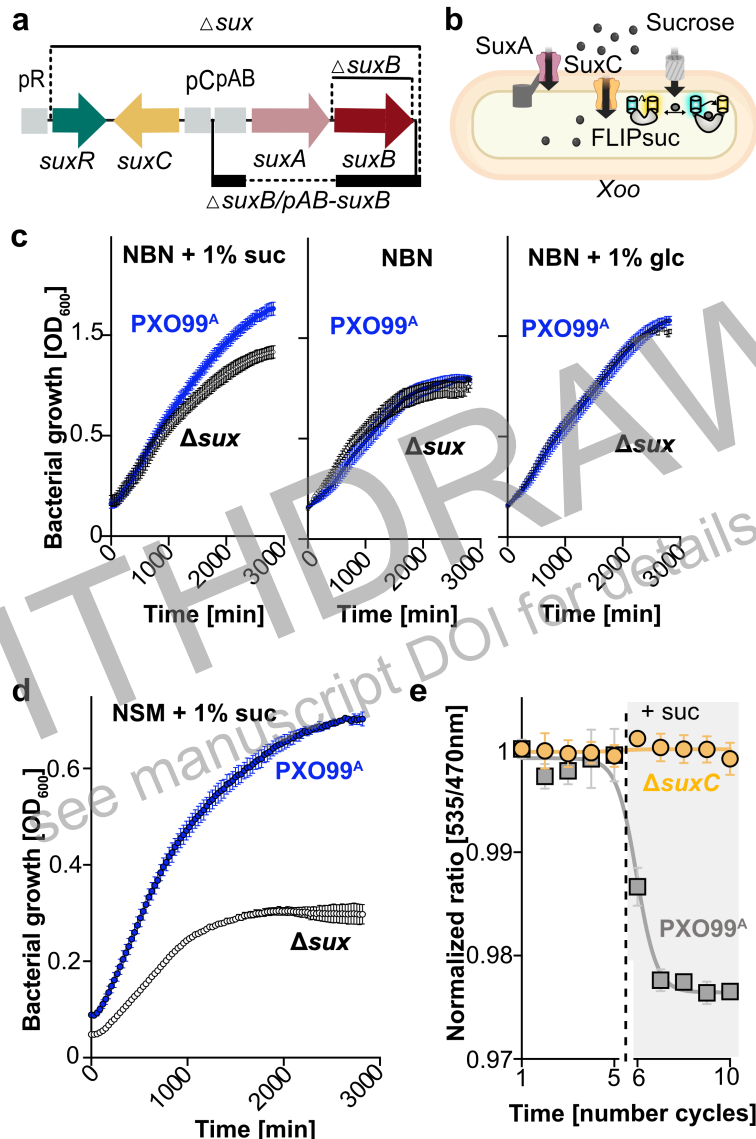

1059

1060

1061

1062

1063

1064

1065

1066

1067

1068

1069

1070

1071

1072

**Figure 2. Effect of mutations in *suc* genes on bacterial growth and sucrose uptake as measured with a sucrose FRET sensor.** **a.** Illustration of deletions used in this study **b.** Illustration of *Xoo* expressing the FLIPsuc-90 $\mu$  $\Delta$ 1V with an unbound state in which the eYFP/eCFP emission ratio is high and a sucrose-bound state in which eYFP/eCFP emission ratio which is low. **c.** Growth curves of PXO99<sup>A</sup> (blue) and  $\Delta$ *suc* (white) in NBN, NBN + 1 % sucrose or NBN + 1 % glucose (n=4). **d.** Growth curves of PXO99<sup>A</sup> (blue) and  $\Delta$ *suc* (white) in synthetic minimal medium (NSM) + 1 % sucrose (n=4). **e.** Sucrose uptake assay using the cytosolic genetically encoded FRET sensor FLIPsuc90 $\mu$  $\Delta$ 1V (ref. (56)) in PXO99<sup>A</sup> or  $\Delta$ *sucC*. X-axis broken at time when sucrose was added to the microplate (grey dash); one cycle was 22 seconds. Decrease in emission intensity ratio corresponds to increase in cytosolic sucrose levels (n=4). All experiments repeated independently at least three times. See also S4 Fig.

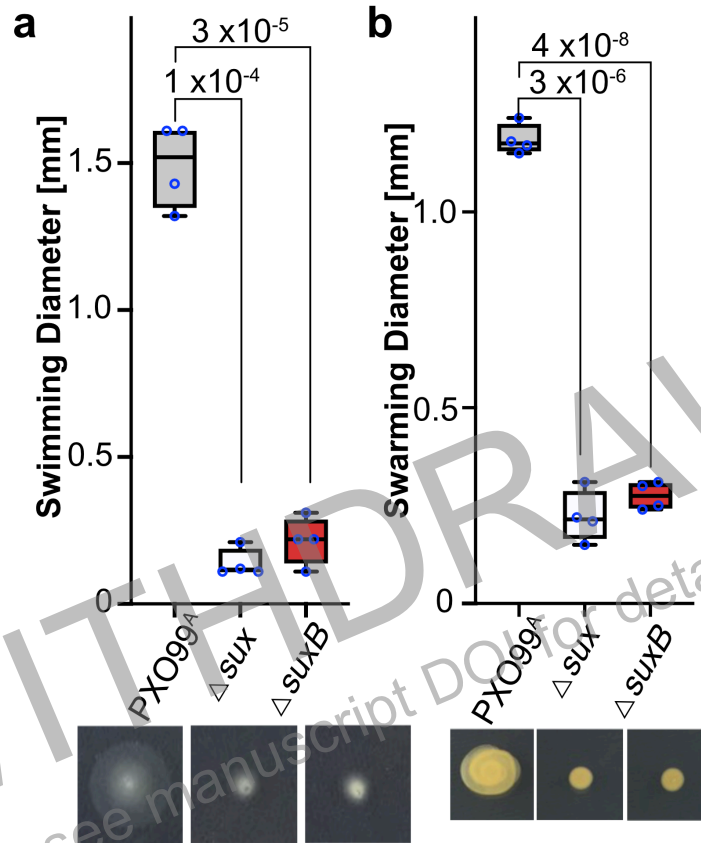

1073

1074

1075 **Figure 3. Effects of mutations in *sux* genes on swimming and swarming**  
1076 **motility. a.** *sux* mutants show reduced swimming motility in quantitative assays  
1077 (n=4) and **b.** Swarming motility assays (n=4). Boxes extend from 25th to 75th  
1078 percentiles and display median values as center lines. Whiskers plot minimum and  
1079 maximum values and individual data points. Significance was calculated between  
1080 two groups using unpaired two-tailed Student's *t* test at the 95 % confidence level  
1081 and Welch's correction of unequal variances. Comparable results were obtained  
1082 in three independent experiments. See also S5 and S6 Fig.

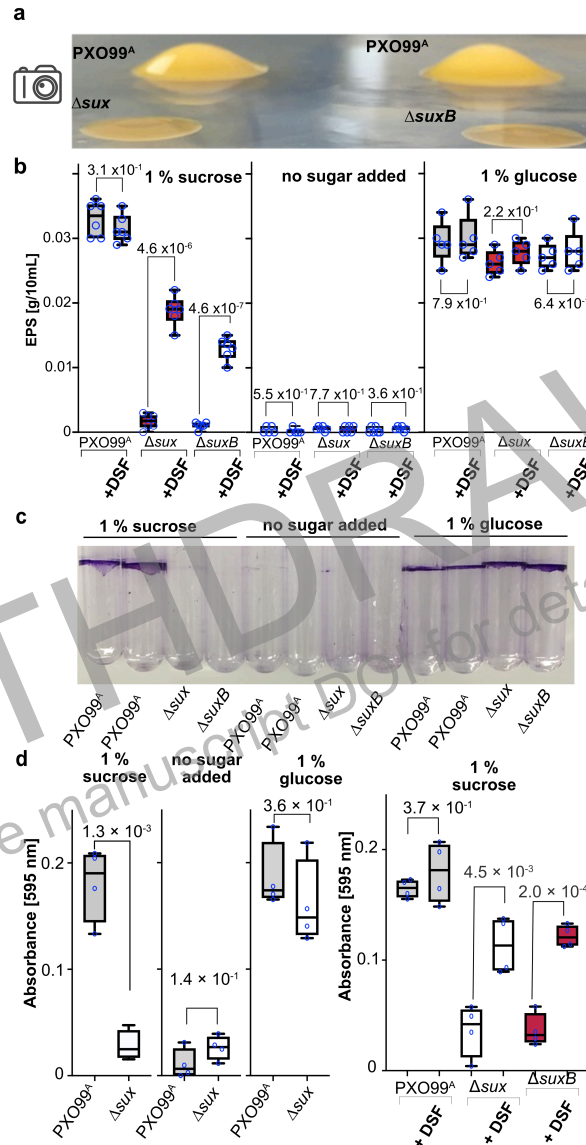

1083  
1084  
1085  
1086  
1087  
1088  
1089  
1090  
1091  
1092  
1093  
1094  
1095  
1096  
1097  
1098

**Figure 4. Effect of mutations in *suc* genes on EPS production and biofilm formation.** **a.** Colony morphology on spot assays of *Xoo* grown uninverted on NBN + 1 % sucrose. Photography was performed horizontally (from the side, indicated by camera logo). **b.** Quantification of EPS produced by *Xoo* grown in liquid culture. The ability of wild-type and *suc* mutant strains to produce EPS was assessed ( $n \geq 4$ ). The effect of DSF on EPS production in  $\Delta*sux*$  and  $\Delta*suxB*$  mutant strains of PXO99<sup>A</sup> in the presence and absence of sucrose or glucose was measured. **c.** and **d.** Biofilm formation was determined in *Xoo* cultures in NBN + 1 % sucrose followed by crystal violet staining and quantified at OD<sub>595</sub> ( $n \geq 4$ ). Boxes extend from 25th to 75th percentiles and display median values as center lines. Whiskers plot minimum and maximum values and individual data points. Significance was calculated between two groups using unpaired two-tailed Student's *t*-Test at the 95 % confidence level and Welch's correction of unequal variances. Comparable results were obtained in three independent experiments. See also S7, S8, S9 and S10 Figures.

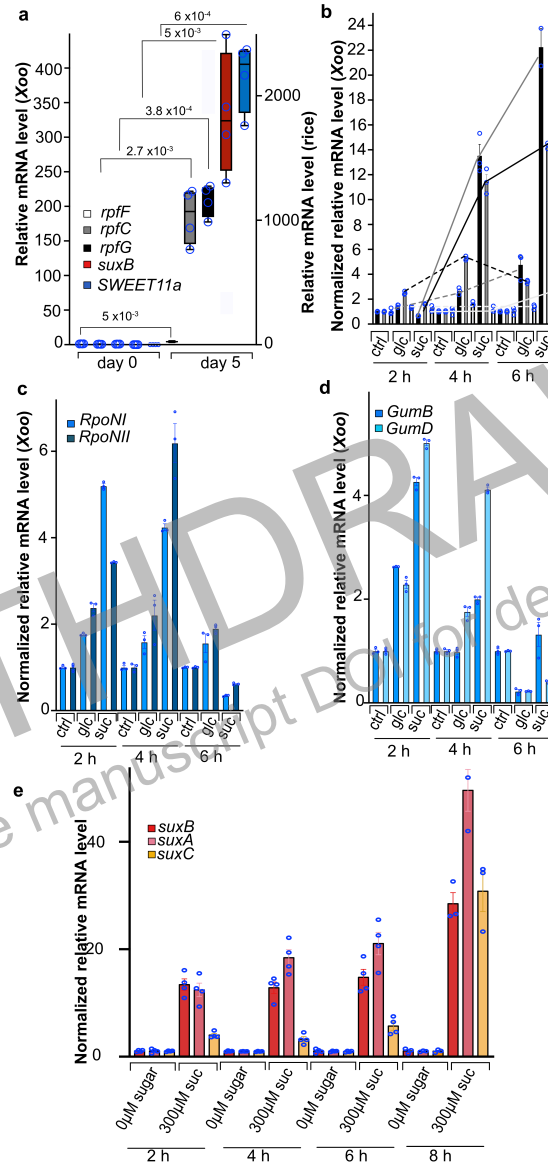

1099

1100

1101 **Figure 5. Regulation of quorum sensing genes during infection and *in vitro***

1102 **by sugars. a.** *in planta* qRT-PCR for *SWEET11a*, *suxB* and *rpfF*, *rpgG* and *rpfC*

1103 mRNA levels during PXO99<sup>A</sup> infection. **b.** Effect of sugars on *rpfF*, *rpgG* and *rpfC*

1104 gene mRNA levels in PXO99<sup>A</sup> grown in culture; **c.** Effect of sugars on mRNA levels

1105 of sigma factor RpoN genes. **d.** Effect of sugars on *gum* genes. **e.** Effect of sucrose

1106 on *sux* genes after 2h, 4h, 6h and 8h. Ctrl. No sugar added; glc: glucose; suc:

1107 sucrose. Data from three to four biological samples. Boxes extend from 25th to

1108 75th percentiles and display median values as center lines. Whiskers plot minimum

1109 and maximum values and individual data points. Significance was calculated

1110 between two groups using unpaired two-tailed Student's *t* test at the 95 %

1111 confidence level and Welch's correction of unequal variances. Comparable results

1112 were obtained in three independent experiments. The  $2^{-\Delta\Delta C_t}$  method was used for

1113 relative quantification using 16S rRNA as reference. Transcript levels were then

1114 normalized to the control, and the control value was shown (at 1 PXO99<sup>A</sup> no sugar

for *in vitro* and 0 day for *in planta*). See also S11 and S12 Figures.

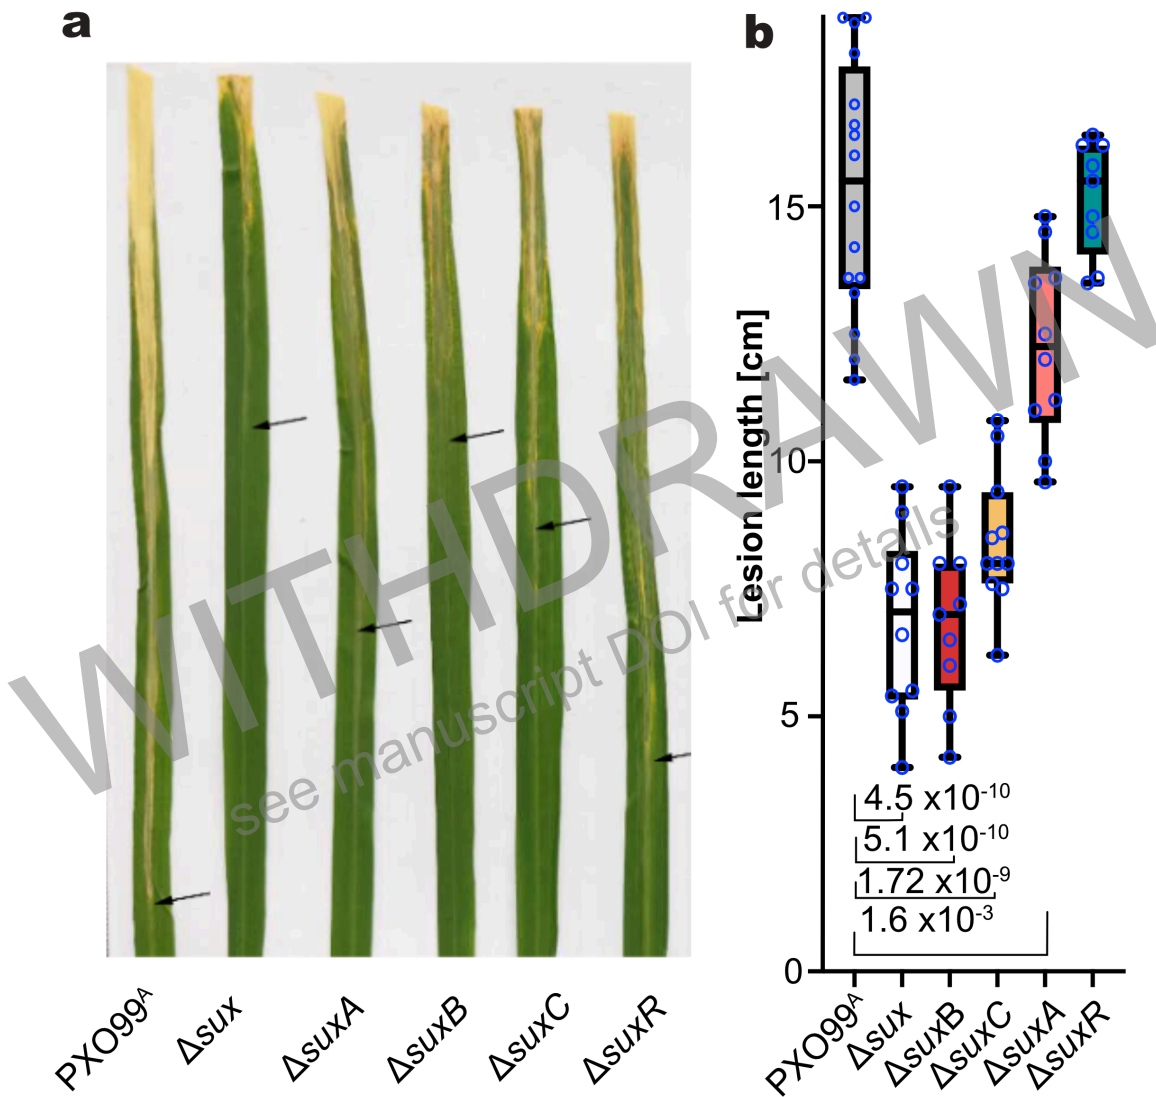

1115  
1116  
1117  
1118  
1119  
1120  
1121  
1122  
1123  
1124  
1125

**Figure 6. Role of *sux* genes for virulence of *Xoo* in rice.** a. Leaf phenotypes in rice cultivar Nipponbare after clip-infection with PXO99<sup>A</sup> and three *sux* mutants at 12 DPI in the rice cultivar Nipponbare. b. Quantification of lesion length (n=7). Boxes extend from 25th to 75th percentiles and display median values as center lines. Whiskers plot minimum and maximum values and individual data points. Significance was calculated between two groups using unpaired two-tailed Student's *t* test at the 95 % confidence level and Welch's correction of unequal variances. Similar results were obtained in three independent experiments. Significance listed only for pairs that showed a significant difference ( $p < 0.05$ ). Data for complementation of mutants presented in S13 Figure.

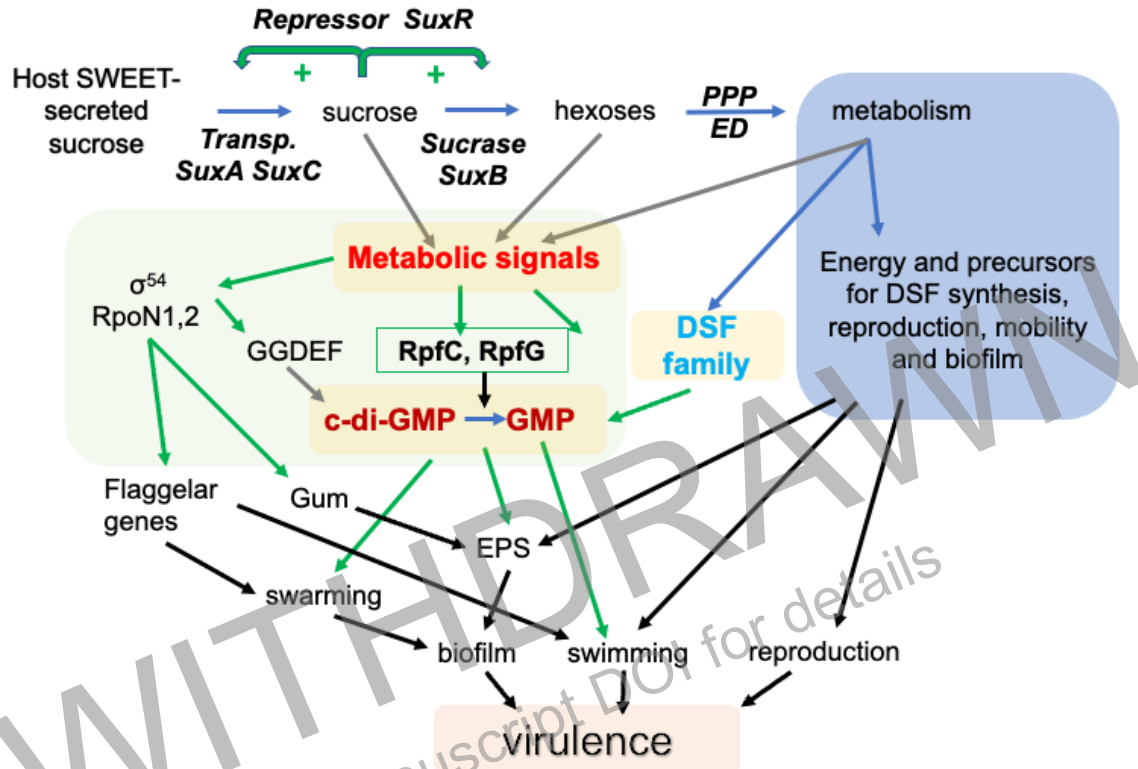

1126  
1127  
1128  
1129  
1130  
1131  
1132  
1133  
1134  
1135  
1136  
1137  
1138  
1139  
1140  
1141  
1142  
1143  
1144  
1145  
1146  
1147  
1148  
1149  
1150  
1151

**Figure 7. Model for dual roles of sucrose as carbon and energy source and signaling required for virulence of *Xoo*.** *Xoo* induces SWEET-mediated sucrose efflux from the host. *Xoo* takes up sucrose via SuxA and SuxC transporters and metabolizes sucrose to hexoses via the *suxB* sucrase. These sugars are further metabolized via the Entner-Doudaroff (ED) and oxidative pentose phosphate pathway (PPP). The sugars or their downstream metabolites are then used for two major purposes: building blocks for cell division, biofilm production, synthesis of DSF family quorum sensing factors, as precursors for synthesis of other metabolites and to produce energy (ATP). Energy is required for biosynthetic processes as well as mobility (swimming and swarming) and thus ultimately for growth and many key aspects required for virulence (blue box). The *sux* genes are subject to SuxR-mediated feedforward regulation (bold green arrows and +) and induction during infection coincides with SWEET induction in the host; sucrose is sufficient for induction. Mutation of components of the *sux* sucrose utilization system lead reduced swimming, swarming, EPS/biofilm production, reproduction and virulence as shown in this manuscript. On top of the metabolic roles of sucrose and its metabolic products, these also serve in signaling processes (green box). We show here that transcripts for the two components histidine kinase relay system with a dual role in di-guanine cyclase activity (82) RpfC and RpfG are also sucrose-inducible, possibly sensitizing the cells to the quorum sensing family during infection. It is well established that quorum sensing factors trigger biofilm production, motility and swarming and are key to virulence (83). At the same time, sucrose or its metabolites induce the genes for the sigma-54 factors RpoN1 and RpoN2 as shown here. The sigma factors are essential for virulence as well, and mutant analyses show that in the absence of the sigma factors, flagellar assembly



1152 is blocked, preventing effective swimming and swarming, *gum* gene transcripts  
1153 responsible for EPS are produced at reduced rates and mRNAs for GGDEF genes  
1154 with unknown function, but homology to guanylate cyclases, are produced to lower  
1155 levels (60). The regulatory network presented here contains many unknowns, e.g.,  
1156 what is the actual inducer of gene expression, what are the receptors, and the  
1157 network is highly complex with differential roles of the two sigma factors and the  
1158 different DSF family forms. Taken together, *Xoo* makes use of the host secreted  
1159 sucrose and virulence likely depends on both signaling and metabolic roles of  
1160 sucrose or its downstream metabolites. Blue arrows: metabolic conversions; thin  
1161 green arrows: transcriptional regulation; grey arrows predicted links; Black arrows:  
1162 effects.  
1163

WITHDRAWN  
see manuscript DOI for details

1164 **Supporting information**

1165

1166 **S1 Table. Homologs of the *sux* gene cluster in *Xoo* and *Xcc***

1167 <sup>a</sup> in reference to *Xcc* homologs from Blanvillain and Meyer (33)

1168 <sup>b</sup> The upper line for the nucleotide identity and the lower for the amino acid identity  
1169 between *Xoo* and *Xcc* genes and proteins, respectively.

1170 **S2 Table. Conservation of the *sux* locus among *Xanthomonas* spp.**

1171 **S3 Table. Bacterial strains and plasmids used in this study.**

1172 **S4 Table. Oligonucleotides used in this paper.**

1173 **S5 Table. Absolute Ct values for qRT-PCR experiments**

1174 **S6 Table. OD<sub>600</sub> and CFU/mL of PXO99<sup>A</sup> and  $\Delta$ *sux* mutant**

1175

1176 **S1 Figure. Potential functions of *Xoo*-encoded *sux* gene products in sucrose**  
1177 **uptake and utilization in the rice leaf xylem.** Model of the feeding hypothesis in  
1178 which the *sux* gene cluster components enable *Xoo* to utilize sucrose exported by  
1179 SWEETs from the xylem parenchyma into the apoplasmic space. The activity of  
1180 the SWEETs is triggered by TAL effectors from *Xoo*. Sucrose is imported across  
1181 the outer membrane of *Xoo* by SuxA, a TonB-dependent receptor, then taken up  
1182 across the inner membrane with the help of SuxC, a major facilitator superfamily  
1183 (MFS) sucrose transporter. Intracellular sucrose is detected by SuxR, a LacI-type  
1184 repressor, which derepresses the other *sux* genes in a sucrose-dependent  
1185 manner. SuxB hydrolyzes sucrose to produce glucose and fructose, which are  
1186 further metabolized in the cell. TonB is typically involved in transducing energy to  
1187 multiple TBDRs, and is encoded by a separate gene.

1188

1189 **S2 Figure. Conservation of *sux* gene cluster in different *Xanthomonas* spp.**

1190 Phylogenetic tree was generated using an alignment of a concatenated *sux* ORF  
1191 cluster sequence (only coding regions were used as a concatenated sequence).  
1192 Sequences from 14 species were used: *X. arboricola* pv. *juglandis*, *X. citri* pv.  
1193 *malvacearum*, *X. vasicola* pv. *vasculorum*, *X. cucurbitae*, *X. phaseoli*, *X. oryzae*  
1194 pv. *oryzicola*, *X. oryzae* pv. *oryzae*, *X. hortorum*, *X. fragariae*, *X. campestris* pv.  
1195 *vesicatoria*, *X. vesicatoria*, *X. campestris* pv. *campestris*, *X. translucens* pv.  
1196 *translucens*, and *X. albilineans*.

1197

1198 **S3 Figure: Sucrose-dependent derepression of *sux* genes by SuxR. a.**

1199 **a.** Predicted binding region for the LacI-type HDH domain transcriptional regulator  
1200 SuxR found by homology to the predicted binding site of *Xam* and *Xag* homologs  
1201 from the RegPrecise database (54). **b.** 3D homology model of SuxR (Magenta)  
1202 based on the structure of the LacI transcriptional regulator CelR in complex with  
1203 cellobiose (PDB ID: 5ysz). **c.** *suxA* transcript levels during infection of Kitaake as  
1204 determined using qRT-PCR (0, 3, 5, 7 and 10 days after infection). **d.** qRT-PCR  
1205 analyses of *suxB* and *suxC* mRNA levels in *Xoo* growing on NB without sugar or

1206 1 % sucrose or glucose in  $\Delta$ *suxR*. Values are derived from four biological  
1207 replicates, each with three technical replicates. Boxes extend from 25th to 75th  
1208 percentiles and display median values as center lines. Whiskers plot minimum and  
1209 maximum values and individual data points. Significance was calculated between  
1210 two groups using unpaired two-tailed Student's *T* test at the 95 % confidence level  
1211 and Welch's correction of unequal variances. The  $2^{-\Delta\Delta Ct}$  method was used for  
1212 relative quantification with 16S rRNA as reference. Relative mRNA levels *in vitro*  
1213 are normalized to 1 for values for data from PXO99<sup>A</sup> without added sugar. Relative  
1214 mRNA levels *in planta* are normalized to 1 for values for data at 0 day. Comparable  
1215 results were obtained in three independent experiments. DBD: DNA binding  
1216 domain; N-RD: N-terminus regulatory domain; C-RD: C-terminus regulatory  
1217 domain.

1218

1219 **S4 Figure. Growth and colony phenotypes of *sux* mutants. Growth and**  
1220 **colony phenotypes of *sux* mutants. a.** Mucoid and dry colony phenotypes of *sux*  
1221 mutants on NB plates with addition of low concentration of sugar (1.5, 3, 6, 12 and  
1222 30  $\mu$ M) and **b.** on NBN, NBN + 1 % sucrose or NBN + 1 % glucose **c.** Growth  
1223 curves of PXO99<sup>A</sup> (blue) and  $\Delta$ *sux* (white) in synthetic minimal medium (NSM) or  
1224 NSM + 1 % glucose (n=4). Experiments were conducted at least three times  
1225 independently. Genotypes are numbered: 1 wild type control, PXO99; 2  $\Delta$ *sux*; 3  
1226  $\Delta$ *suxA*; 4  $\Delta$ *suxB*; 5  $\Delta$ *suxC*; 6  $\Delta$ *suxR*; complementation with constructs using the  
1227 *E. coli* Lac promoter; 7  $\Delta$ *suxA/suxA*; 9  $\Delta$ *suxB/suxB*; 11  $\Delta$ *suxC/suxC*; 13  
1228  $\Delta$ *suxR/suxR*; and complementation with constructs using native *Xoo* promoters; 8  
1229  $\Delta$ *suxA/pA-suxA*; 10  $\Delta$ *suxB/pA-suxB*; 12  $\Delta$ *suxC/pC-suxC*; 14  $\Delta$ *suxR/pR-suxR*.

1230

1231 **S5 Figure. Swimming and swarming motility of  $\Delta$ *sux* mutant. a.** Swimming on  
1232 solid NBN + 1 % sucrose and 0.3 % agar. **b.** Swarming assays on solid NBN + 1  
1233 % sucrose and 0.6 % agar. Comparable results were obtained in three  
1234 independent experiments.

1235

1236 **S6 Figure. EPS, swimming and swarming motility of  $\Delta$ *suxR* mutant. a.**  
1237 Swimming and swarming on solid NBN + 1 % sucrose and 0.3 % agar or 0.6 %  
1238 agar, respectively. **b.** Similar assays on round petri dishes for swarming mobility  
1239 and **c.** for swimming motility. Comparable results were obtained in three  
1240 independent experiments.

1241

1242 **S7 Figure.  $\Delta$ *sux* and  $\Delta$ *suxB* mutants show complete EPS deficiency a.** Colony  
1243 phenotype of PXO99<sup>A</sup> and  $\Delta$ *sux* mutant and **b.**  $\Delta$ *suxR* mutant on solid NBN + 1 %  
1244 of sucrose grown uninverted for day 2, day 3 and day 4. Photography was  
1245 performed vertically (from the top). **c.** Colony morphology on inverted plates (NBN  
1246 + 1 % of sucrose). Photography was performed horizontally (from the side).  
1247 Comparable results were obtained in three independent experiments.

1248

1249 **S8 Figure. EPS production in the presence of sucrose or glucose.**  
1250 Quantification of EPS. The ability of wild-type PXO99<sup>A</sup> and *sux* mutant strains to  
1251 produce EPS was assessed in the presence of sucrose or glucose. Data from three

1252 biological samples. Boxes extend from 25th to 75th percentiles and display median  
1253 values as center lines. Whiskers plot minimum and maximum values and individual  
1254 data points. Significance was calculated between two groups using unpaired two-  
1255 tailed Student's t-Test at the 95 % confidence level and Welch's correction of  
1256 unequal variances. Comparable results were obtained in three independent  
1257 experiments.

1258

1259 **S9 Figure. Sucrose uptake-dependent EPS production in complemented**  
1260 **strains.** Quantification of EPS production in the wild type strain PXO99<sup>A</sup>, in the  
1261  $\Delta$ *suxB* mutant and in a  $\Delta$ *suxB* mutant complemented with the *suxB* gene driven  
1262 from the lacZ promoter in the presence and absence of sucrose (n=3). Comparable  
1263 results were obtained for the sucrose induction in three independent experiments.  
1264

1265

1265 **S10. Figure. Sucrose uptake and biofilm formation. a.** Biofilm formation assays  
1266 of the wild type strain PXO99<sup>A</sup> and the  $\Delta$ *sux* and  $\Delta$ *suxB* mutants in a 96-well plate.  
1267 **b.** Qualitative and quantitative assays for biofilm formation assays in glass tube  
1268 when complemented with DSF. Biofilm formation was determined in *Xoo* cultures  
1269 in NB + 1 % sucrose followed by crystal violet staining. Comparable results were  
1270 obtained for the sucrose induction in three independent experiments.  
1271

1271

1272 **S11 Figure. Growth of *Xoo* on sugar.** Growth of PXO99<sup>A</sup> in the presence or  
1273 absence of 300 $\mu$ M sucrose or glucose. Similar results were obtained in three  
1274 independent experiments.  
1275

1275

1276 **S12 Figure. Regulation of genes in  $\Delta$ *suxR* mutant.** Gene expression on mRNA  
1277 levels in PXO99<sup>A</sup> and  $\Delta$ *suxR* mutant. The 2- $\Delta\Delta$ Ct method was used for  
1278 quantification. The 2- $\Delta\Delta$ Ct method was used for relative quantification with 16S  
1279 rRNA as reference. Transcript levels were then normalized to the control, and the  
1280 control value was shown (at 1 PXO99<sup>A</sup> no sugar).  
1281

1281

1282 **S13 Figure. Virulence of complemented strains using synthetic and**  
1283 **endogenous promoters of *sux* genes. a.** Leaf phenotypes in rice cultivar  
1284 Nipponbare after clip infection with PXO99<sup>A</sup>, *sux* mutants and complementation  
1285 strains at 12 DPI. **b.** Quantification of lesion length for two types of  
1286 complementation strains: complementation with constructs using *E. coli* Lac  
1287 promoter in  $\Delta$ *suxA/suxA*;  $\Delta$ *suxB/suxB*;  $\Delta$ *suxC/suxC*; and  $\Delta$ *suxR/suxR*; and  
1288 complementation with constructs using native *Xoo* promoters in  $\Delta$ *suxA/pA-suxA*;  
1289  $\Delta$ *suxB/pA-suxB*;  $\Delta$ *suxC/pC-suxC*; and  $\Delta$ *suxR/pR-suxR*. Boxes extend from 25th  
1290 to 75th percentiles and display median values as center lines. Whiskers plot  
1291 minimum and maximum values and individual data points. Significance was  
1292 calculated between two groups using unpaired two-tailed Student's t-Test at the  
1293 95 % confidence level and Welch's correction of unequal variances. Similar results  
1294 were obtained in three independent experiments. Significance listed only for pairs  
1295 that showed a significant difference ( $p < 0.05$ ).
